# Supplementary material for: Beta-hydroxyphosphonate ribonucleoside analogues derived from 4-substituted-1,2,3-triazoles as IMP/GMP mimics: synthesis and biological evaluation
Source: PubMed Central journal article supplement (PMC4979751; doi:10.3762/bjoc.12.144), 2016-07-18

## Supporting Information

for

# Beta-hydroxyphosphonate ribonucleoside analogues derived from 4-substituted-1,2,3-triazoles as IMP/GMP mimics: synthesis and biological evaluation

Tai Nguyen Van<sup>1</sup>, Audrey Hospital<sup>1</sup>, Corinne Lionne<sup>2</sup>, Lars P. Jordheim<sup>3</sup>, Charles Dumontet<sup>3</sup>,  
Christian Périgaud<sup>1</sup>, Laurent Chaloin<sup>2</sup> and Suzanne Peyrottes<sup>1,\*</sup>

Address: <sup>1</sup>Institut des Biomolécules Max Mousseron (IBMM), UMR 5247 CNRS – Université de Montpellier - ENSCM, Campus Triolet, cc1705, Place Eugène Bataillon, 34095 Montpellier, France

<sup>2</sup>Centre d'études d'agents Pathogènes et Biotechnologies pour la Santé (CPBS), FRE 3689 CNRS - Université de Montpellier, 1919 route de Mende, 34293 Montpellier, France and <sup>3</sup>Université de Lyon, Université Claude Bernard Lyon 1, INSERM 1052, CNRS 5286, Centre Léon Bérard, Centre de Recherche en Cancérologie de Lyon, 69008 Lyon, France

Email: Peyrottes Suzanne - peyrottes@univ-montp2.fr

\*Corresponding author

### Spectral data for new compounds and 2D NMR studies

|                                                                      |              |
|----------------------------------------------------------------------|--------------|
| 2D-NMR experiments for compounds <b>2</b> , <b>3a</b> and <b>3aa</b> | pages s2–s6  |
| 2D-NMR experiments for compounds <b>3h</b> and <b>3i</b>             | pages s7–s10 |
| 1H NMR, 31P NMR for compound <b>1a</b>                               | s11          |
| 1H NMR, 31P NMR for compound <b>1b</b>                               | s12          |
| 1H NMR, 31P NMR for compound <b>1c</b>                               | s13          |
| 1H NMR, 31P NMR for compound <b>1d</b>                               | s14          |
| 1H NMR, 31P NMR for compound <b>1e</b>                               | s15          |
| 1H NMR, 31P NMR for compound <b>1f</b>                               | s16          |
| 1H NMR, 31P NMR for compound <b>1g</b>                               | s17          |
| 1H NMR, 31P NMR for compound <b>1h</b>                               | s18          |
| 1H NMR, 31P NMR for compound <b>1i</b>                               | s19          |
| 1H NMR, 31P NMR for compound <b>1j</b>                               | s20          |
| 1H NMR, 31P NMR for compound <b>1k</b>                               | s21          |
| 1H NMR, 31P NMR for compound <b>1l</b>                               | s22          |
| 1H NMR, 31P NMR for compound <b>1m</b>                               | s23          |
| 1H NMR, 31P NMR for compound <b>1n</b>                               | s24          |
| 1H NMR, 31P NMR for compound <b>1o</b>                               | s25          |
| 1H NMR, 31P NMR for compound <b>1p</b>                               | s26          |
| 1H NMR, 31P NMR for compound <b>1q</b>                               | s27          |

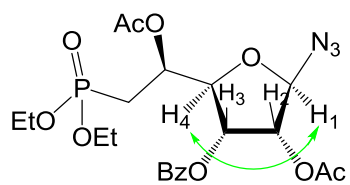

2D-NMR experiments for compound **2**

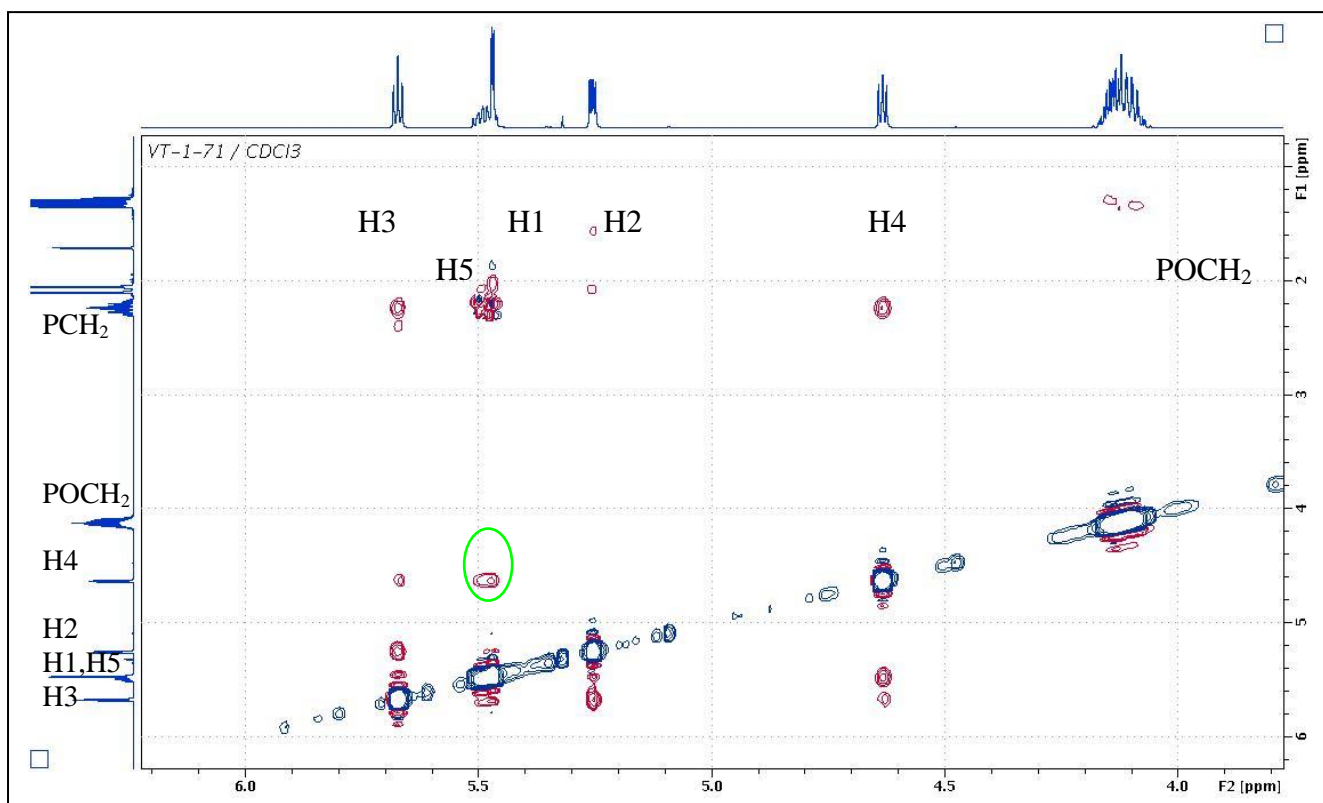

2D-NMR experiments for compounds **3a**

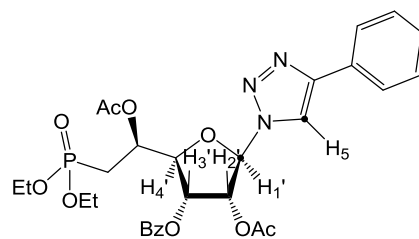

HSQC-experiment

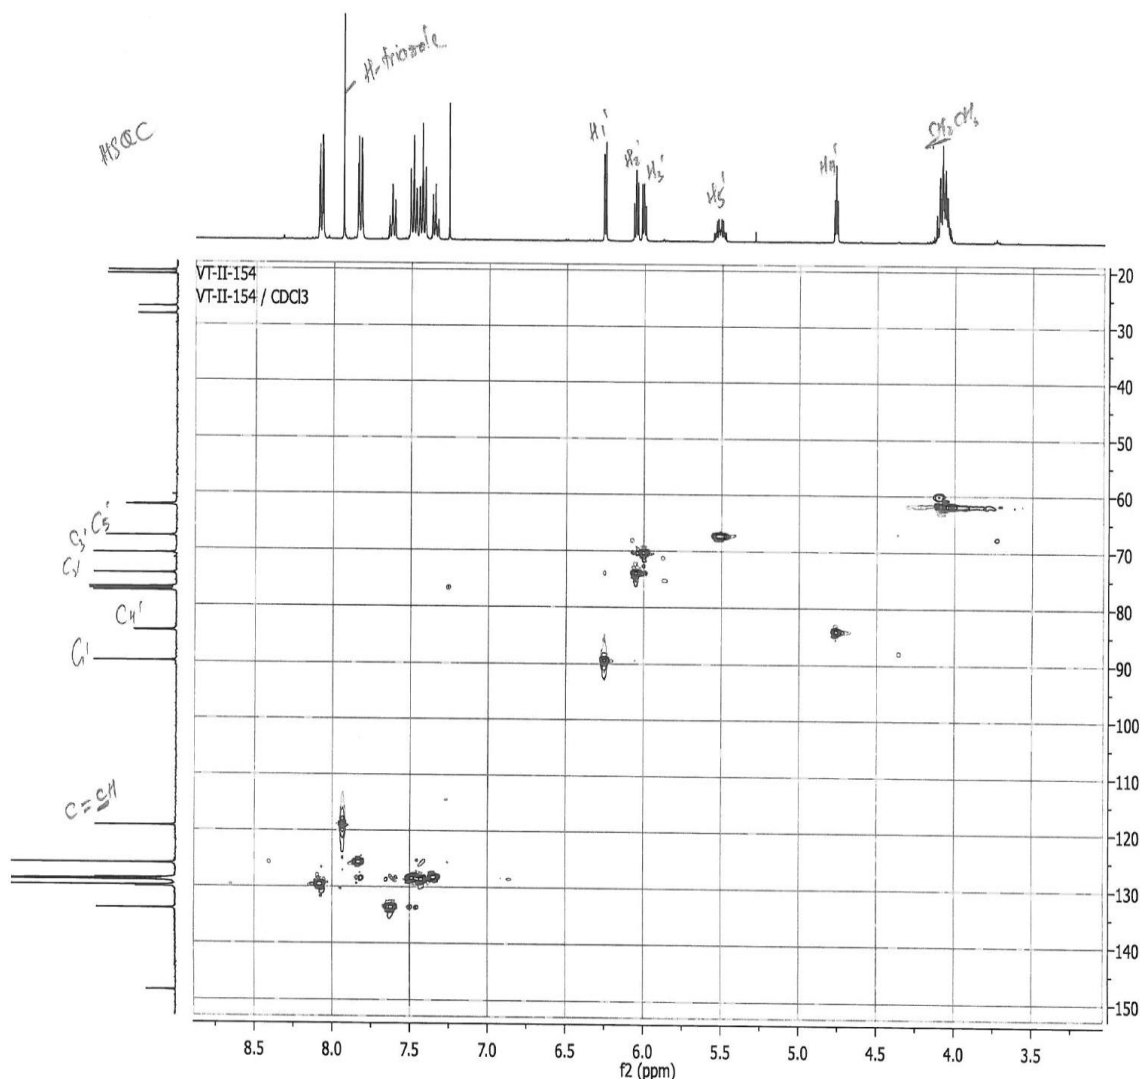

# HMBC-experiment

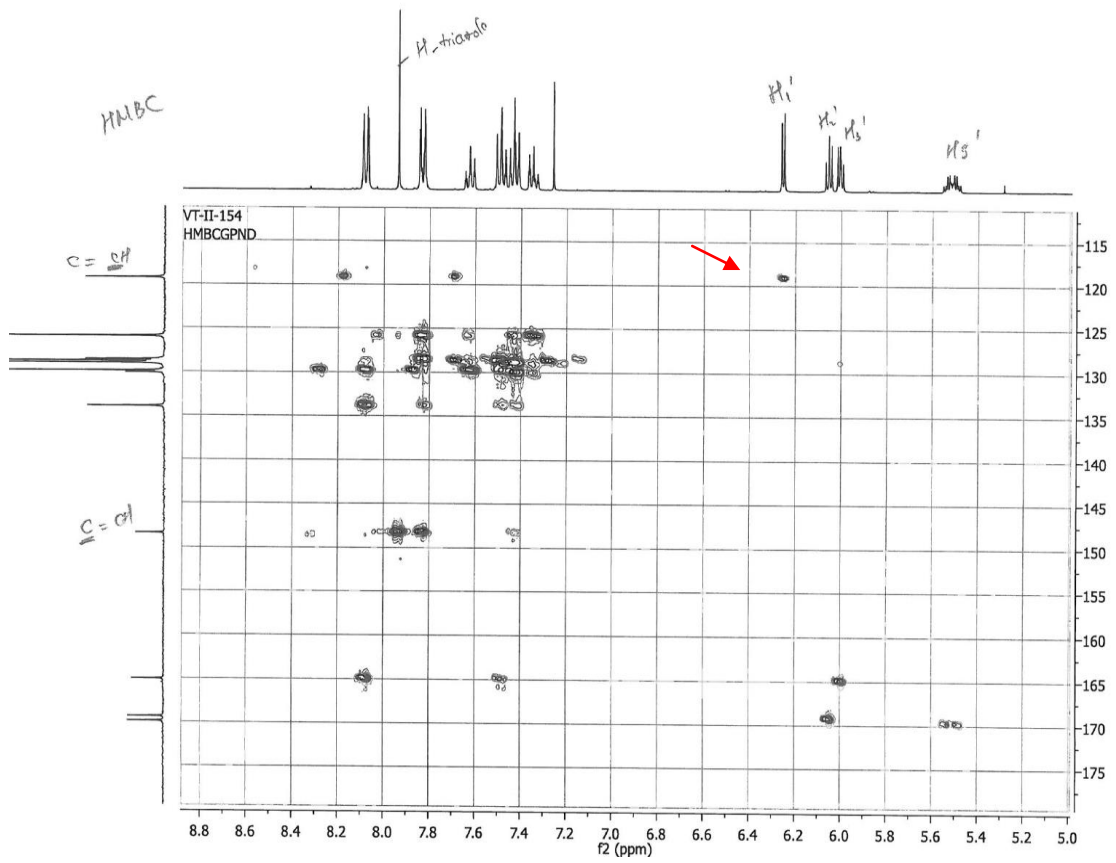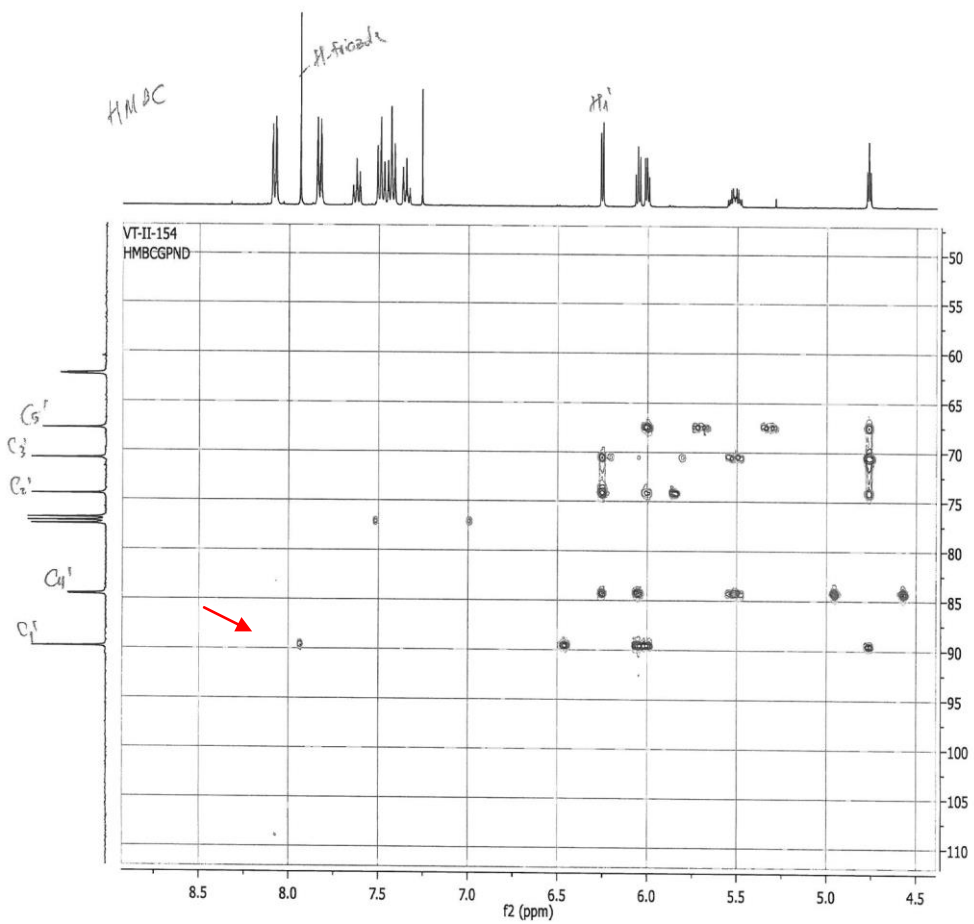

## 2D-NMR experiments for compound **3aa**

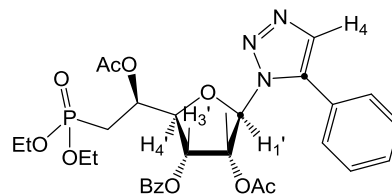

## HSQC-experiment

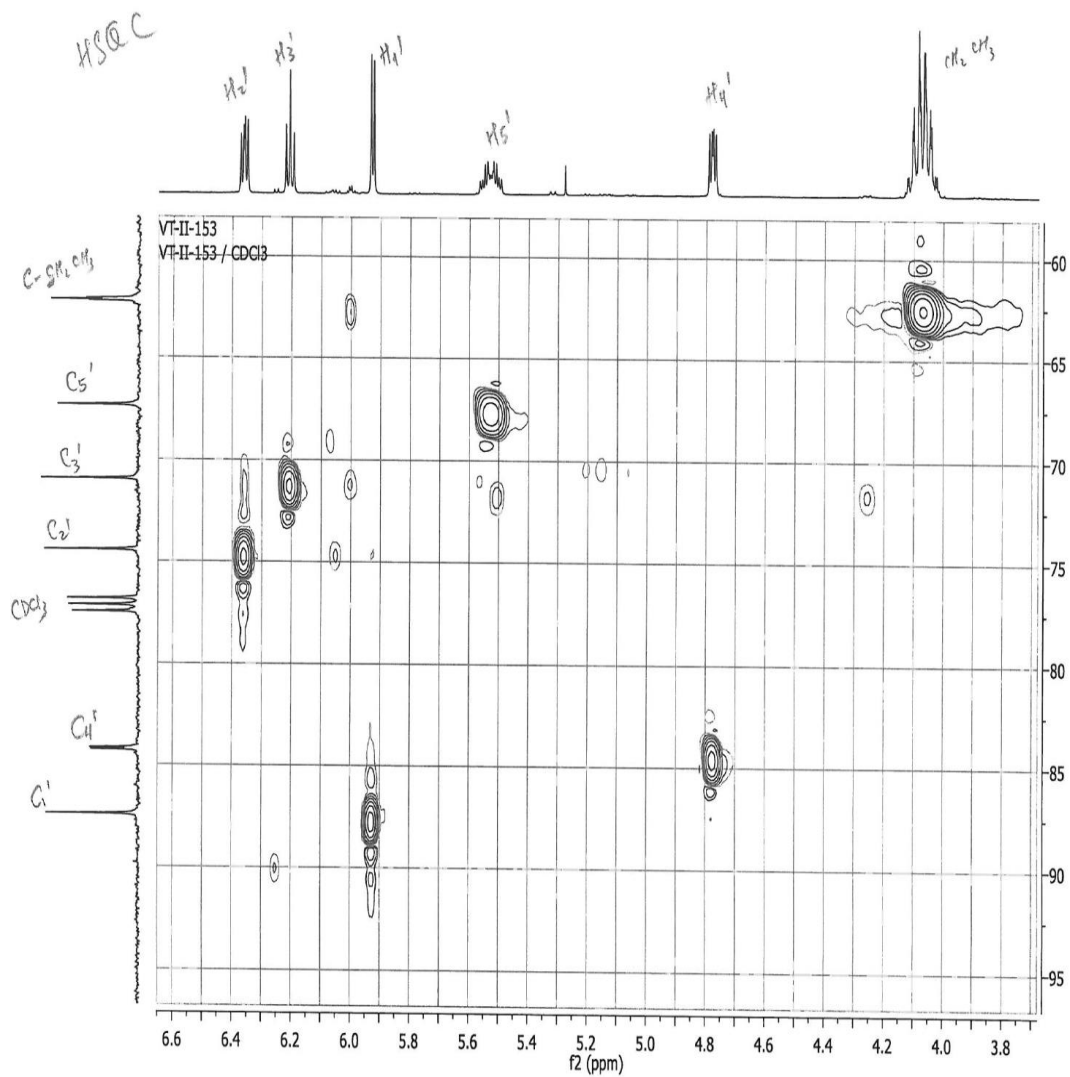



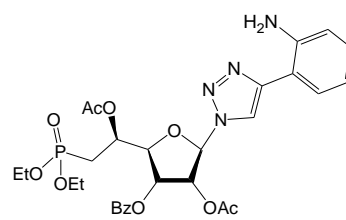

2D-NMR experiments for compounds **3h**

NOESY experiment

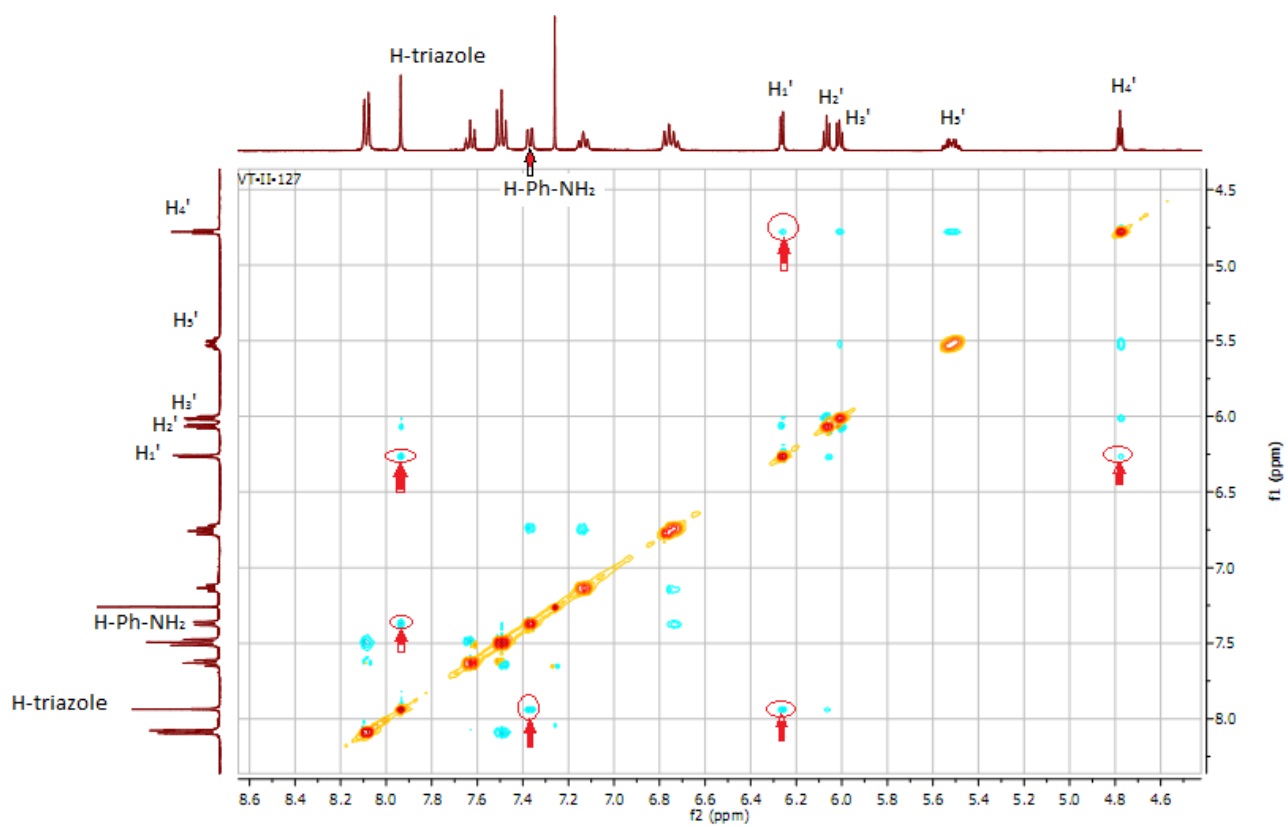

# HMBC experiment

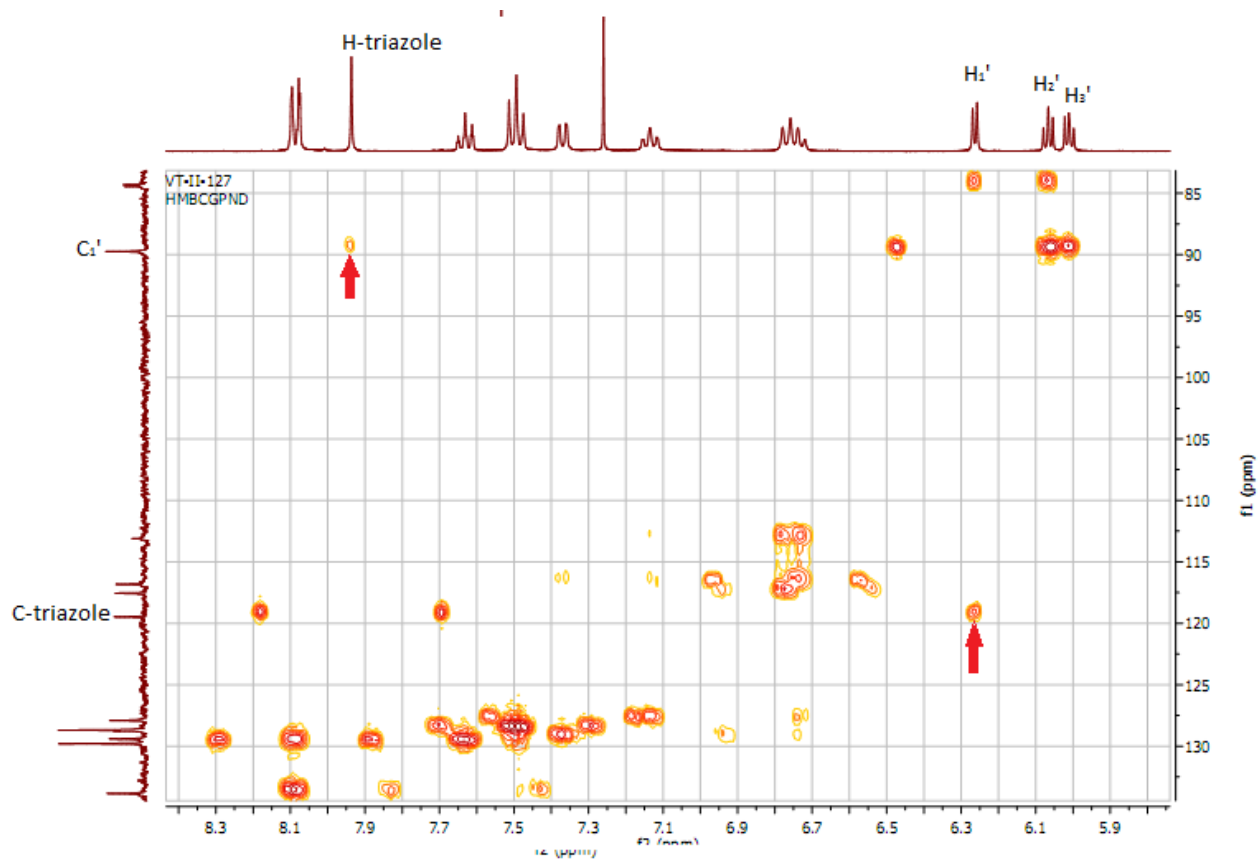



## 2D-NMR experiments for compounds **3i**

### NOESY experiment

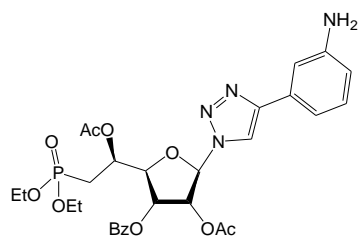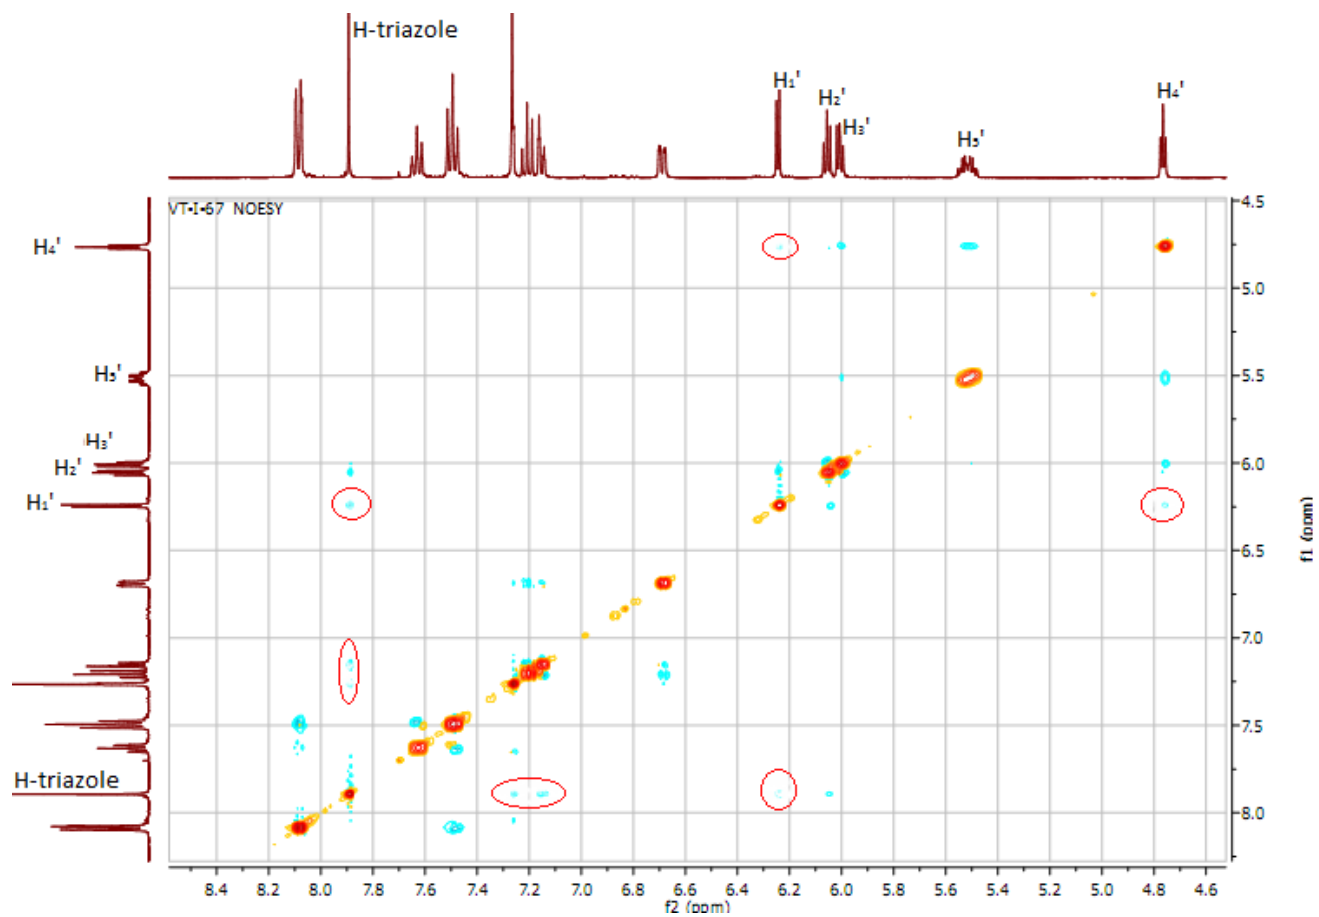

# HMBC experiment

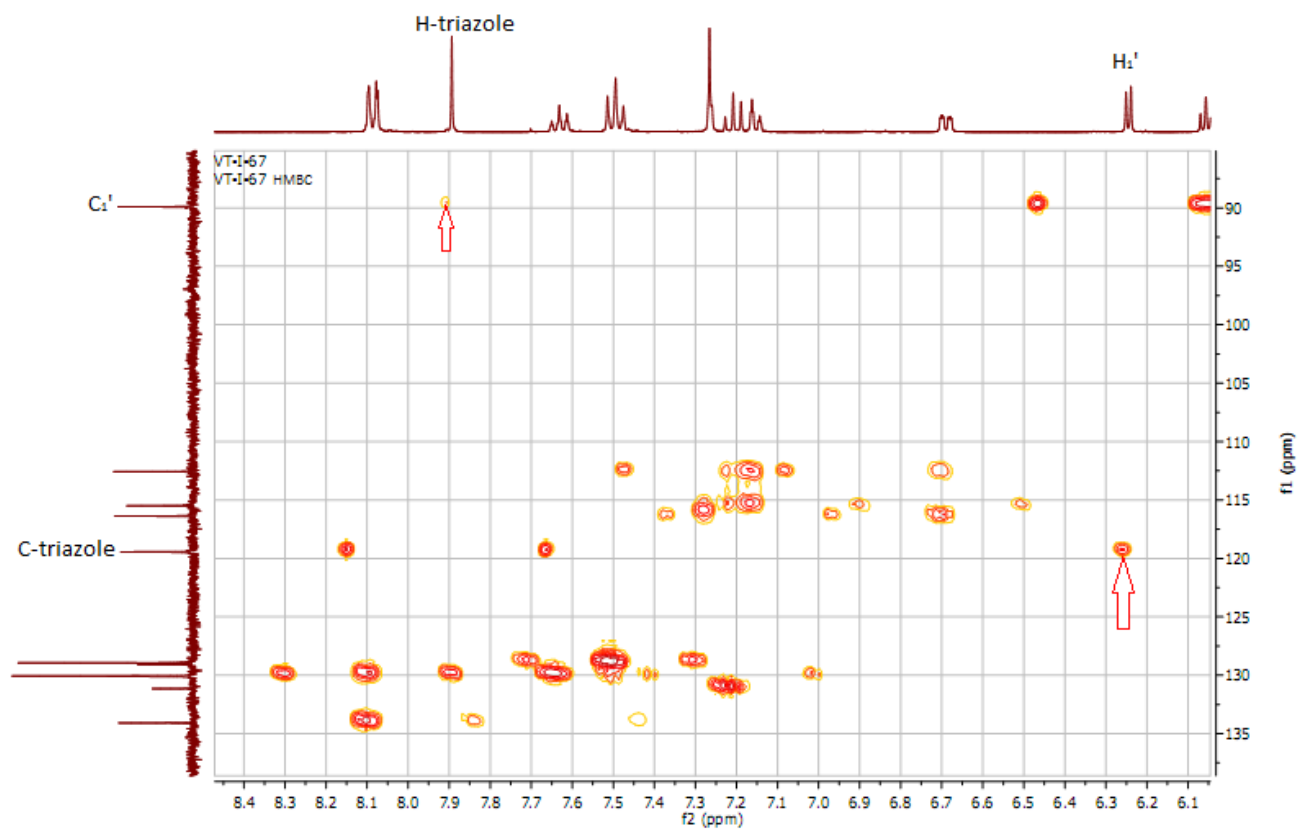

$^1\text{H}$  NMR,  $^{31}\text{P}$  NMR for Compound **1a**

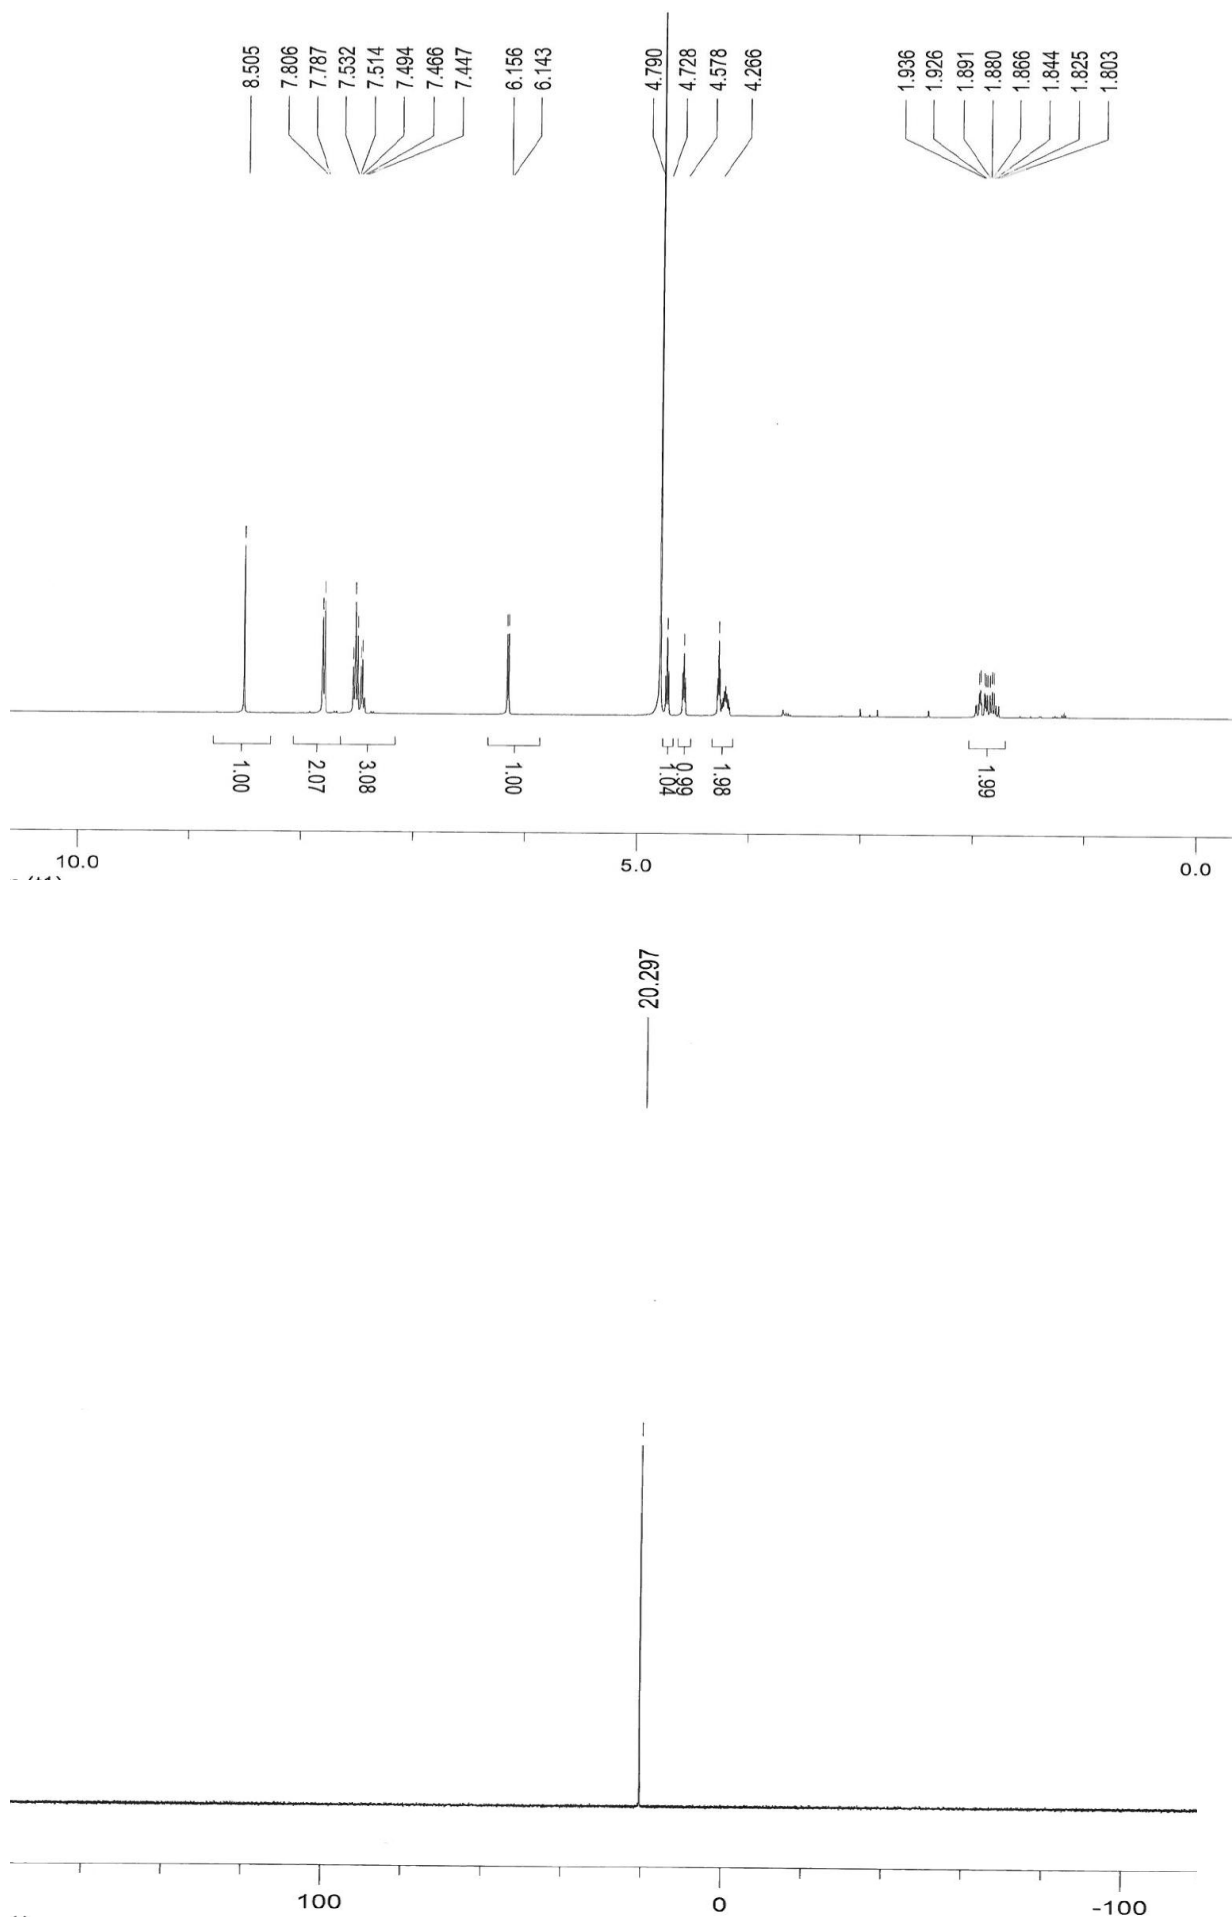

$^1\text{H}$  NMR,  $^{31}\text{P}$  NMR for compound **1b**

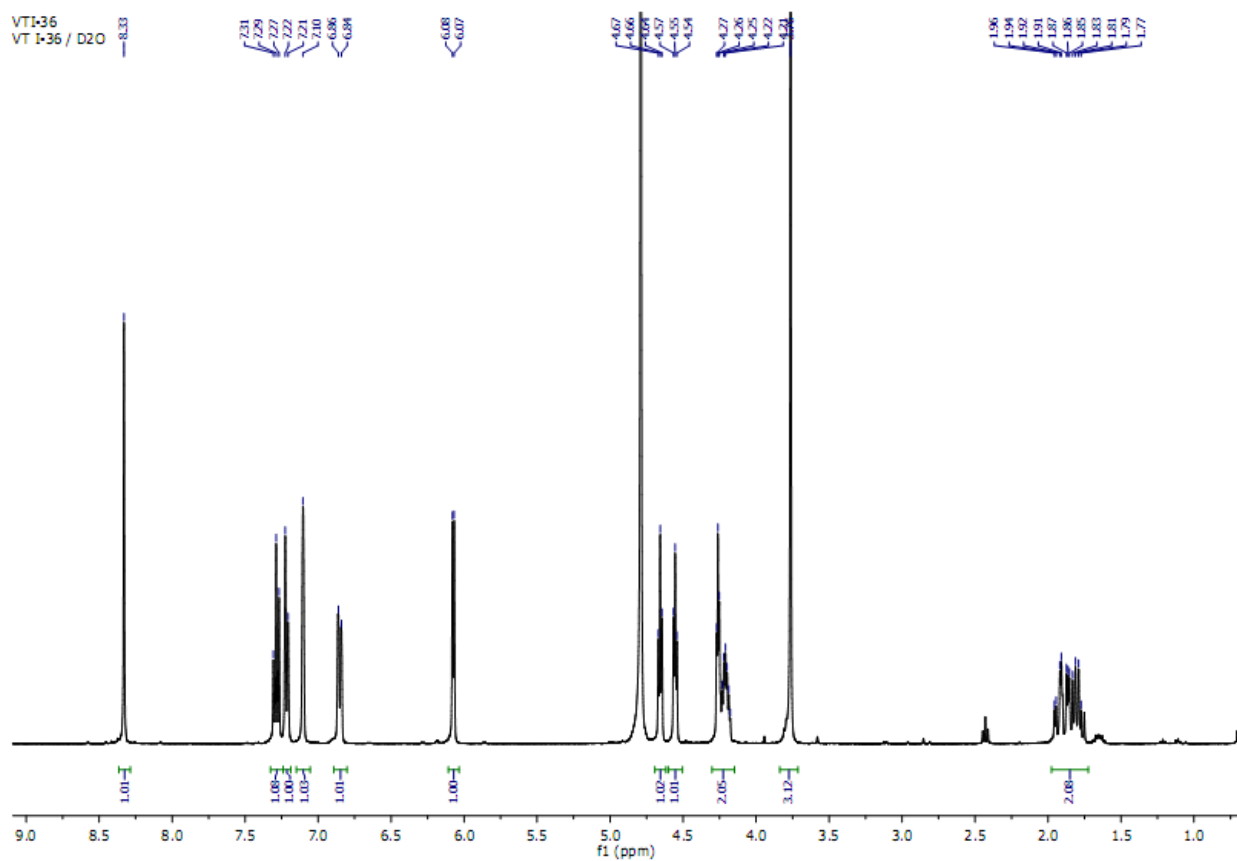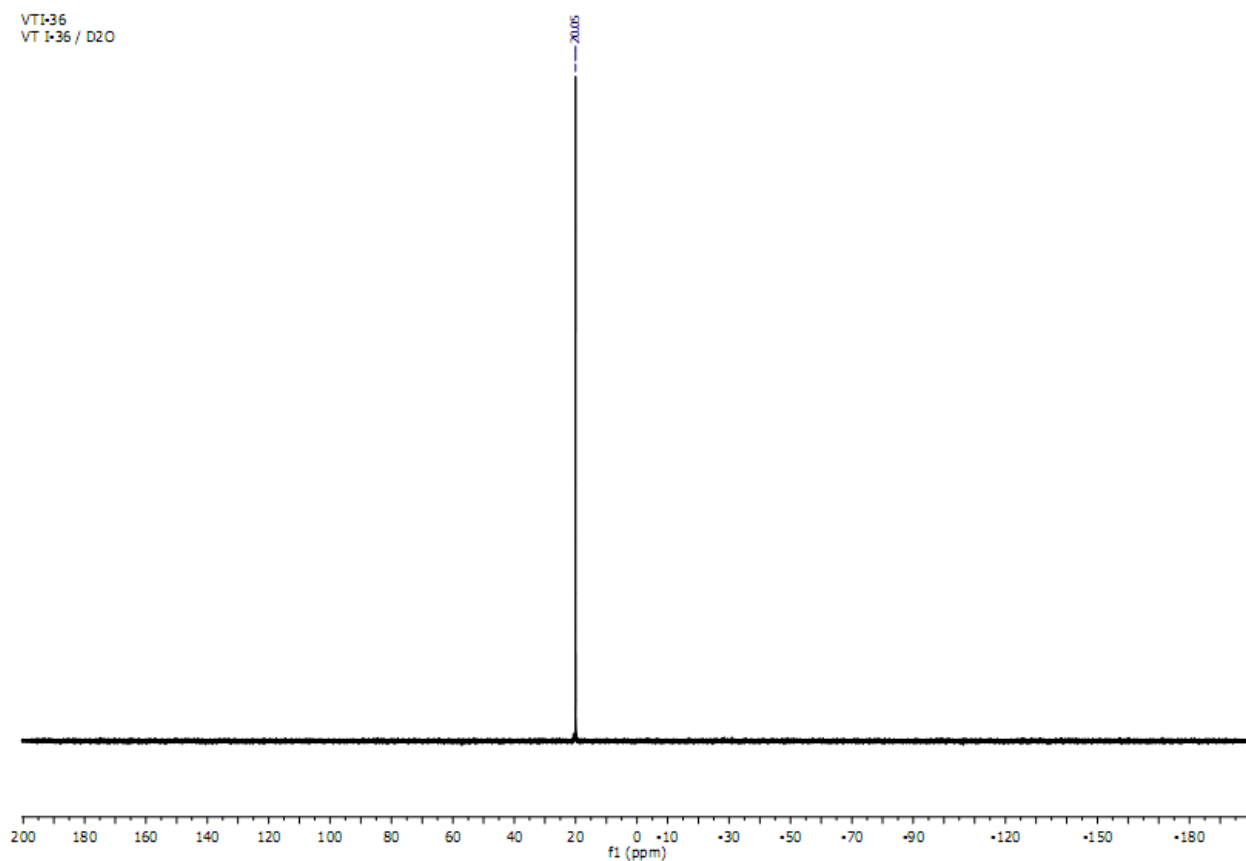

$^1\text{H}$  NMR,  $^{31}\text{P}$  NMR for compound **1c**

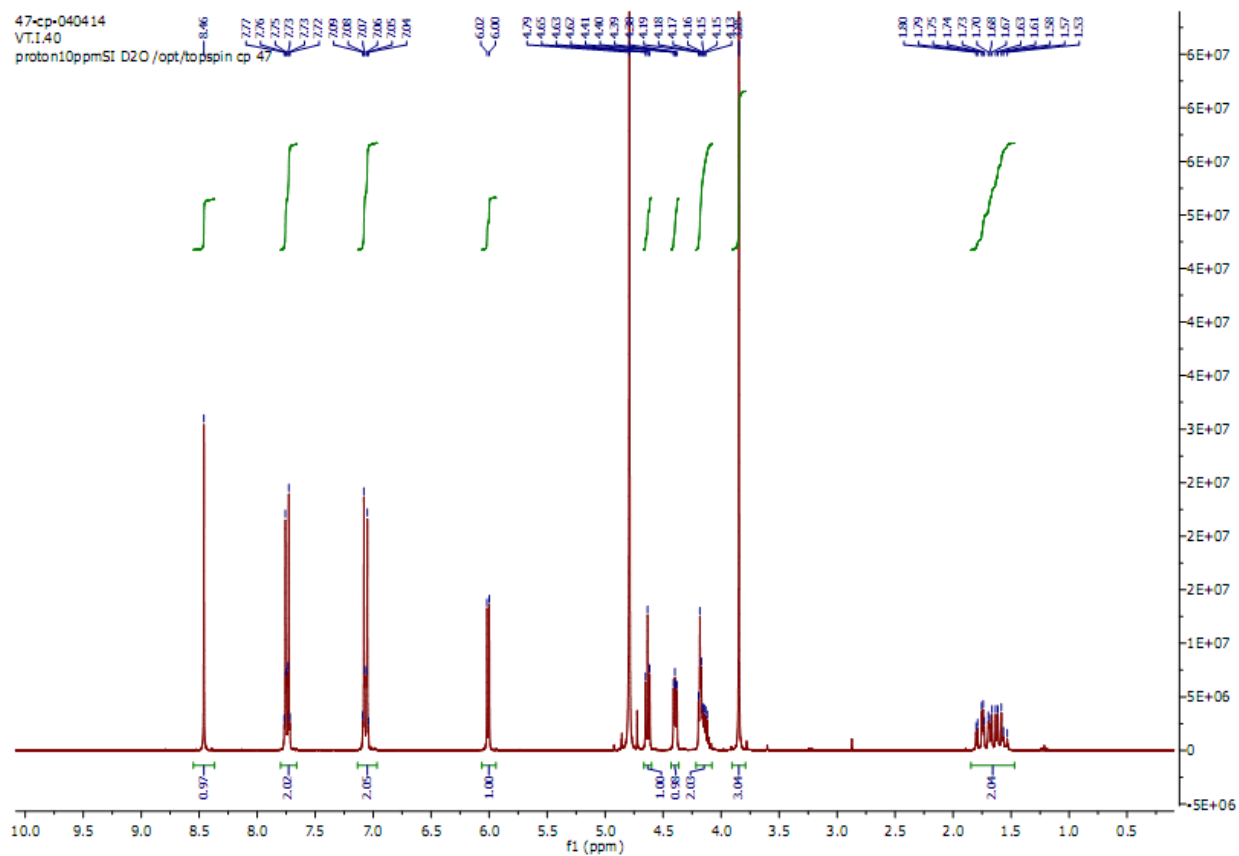

VT140 / D2O

18.65

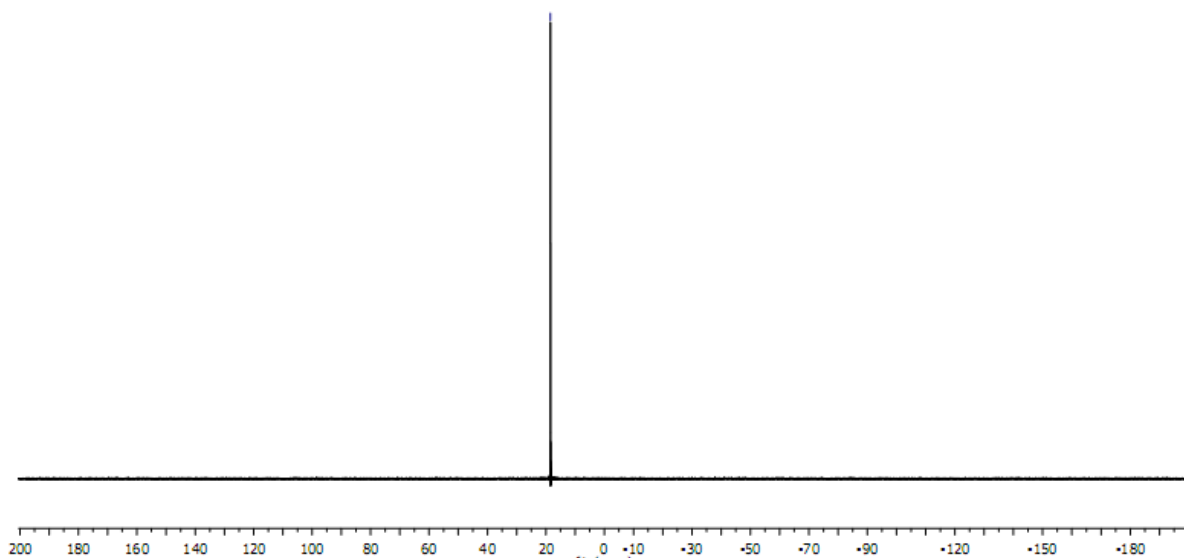

$^1\text{H}$  NMR,  $^{31}\text{P}$  NMR for compound **1d**

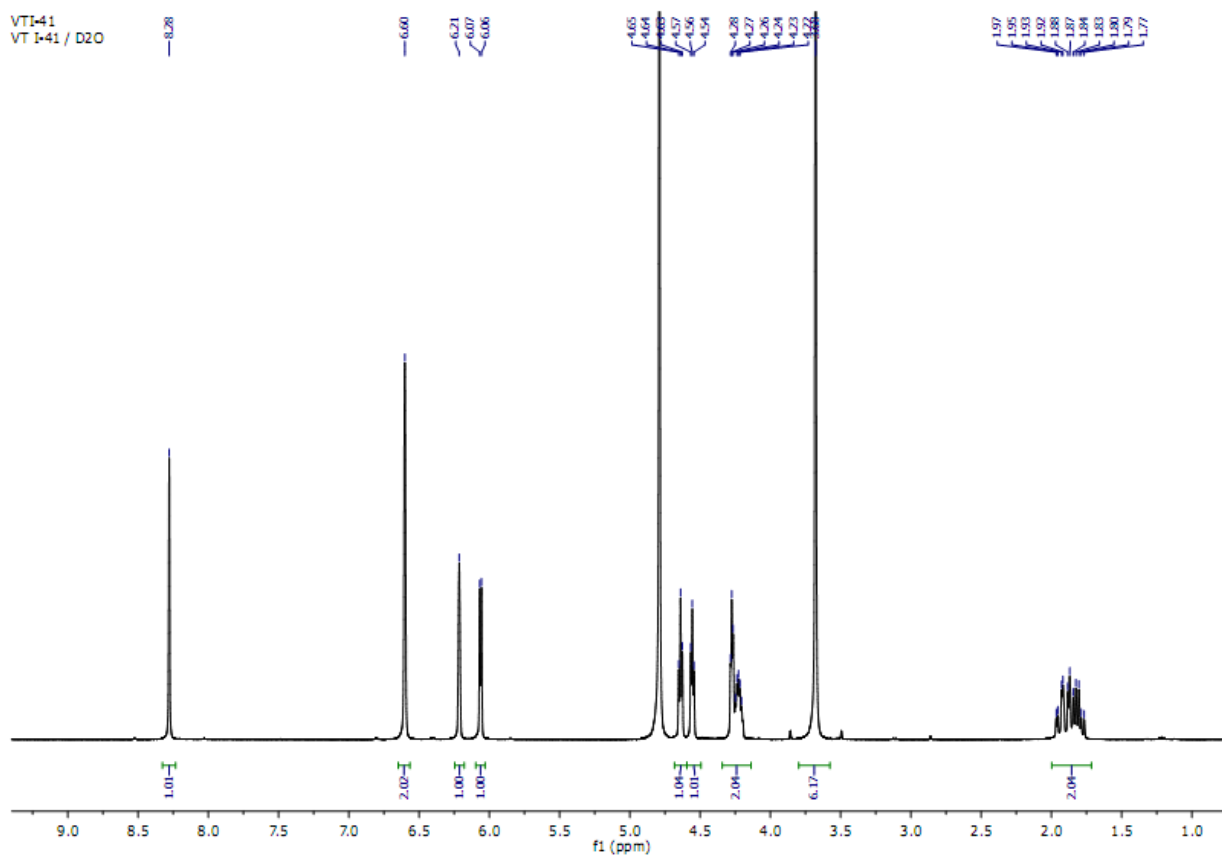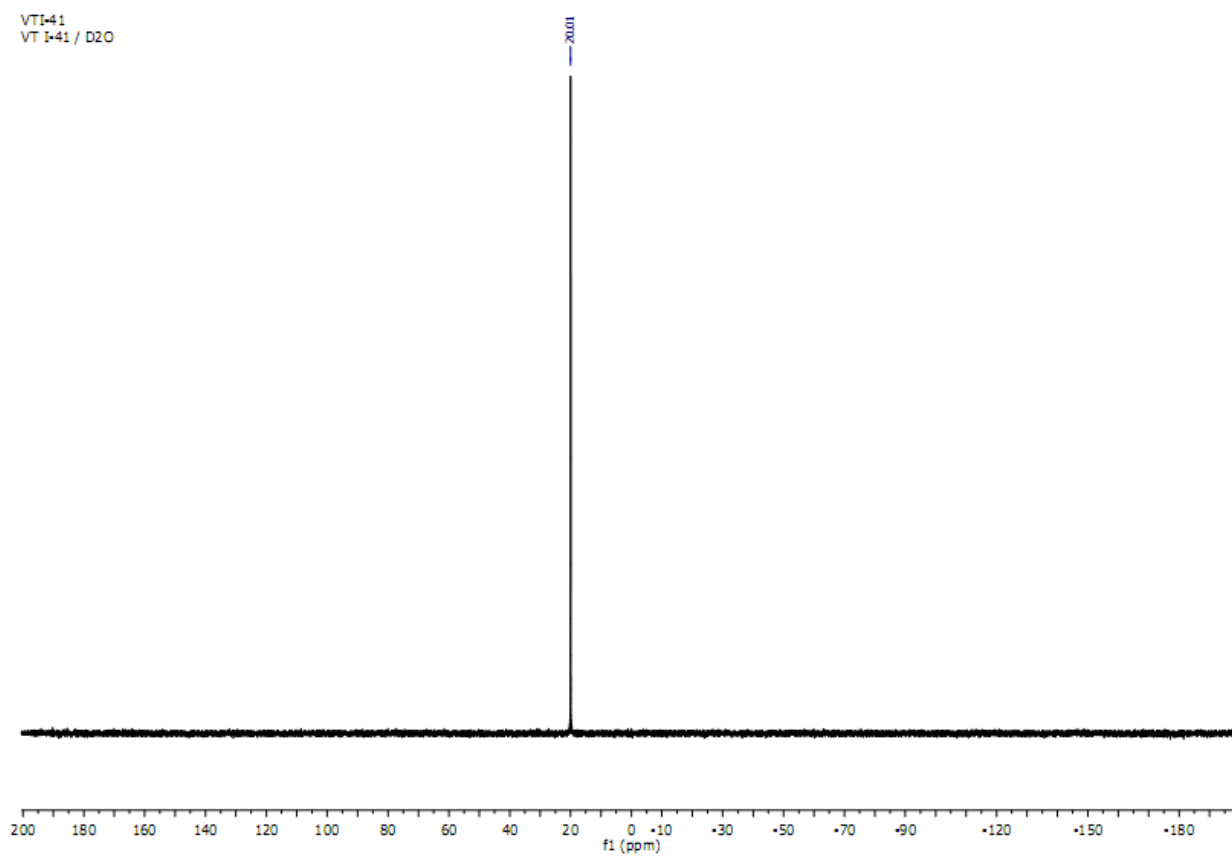

$^1\text{H}$  NMR,  $^{31}\text{P}$  NMR for compound **1e**

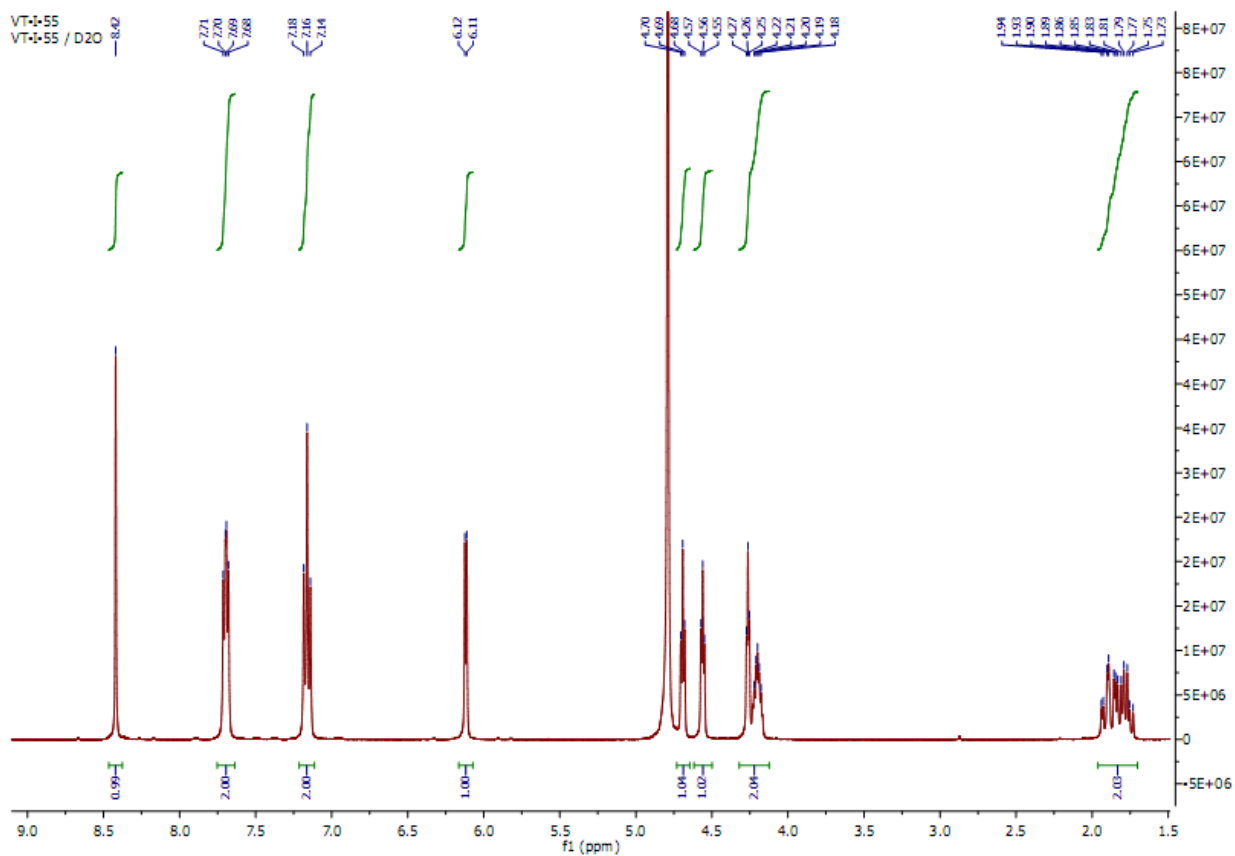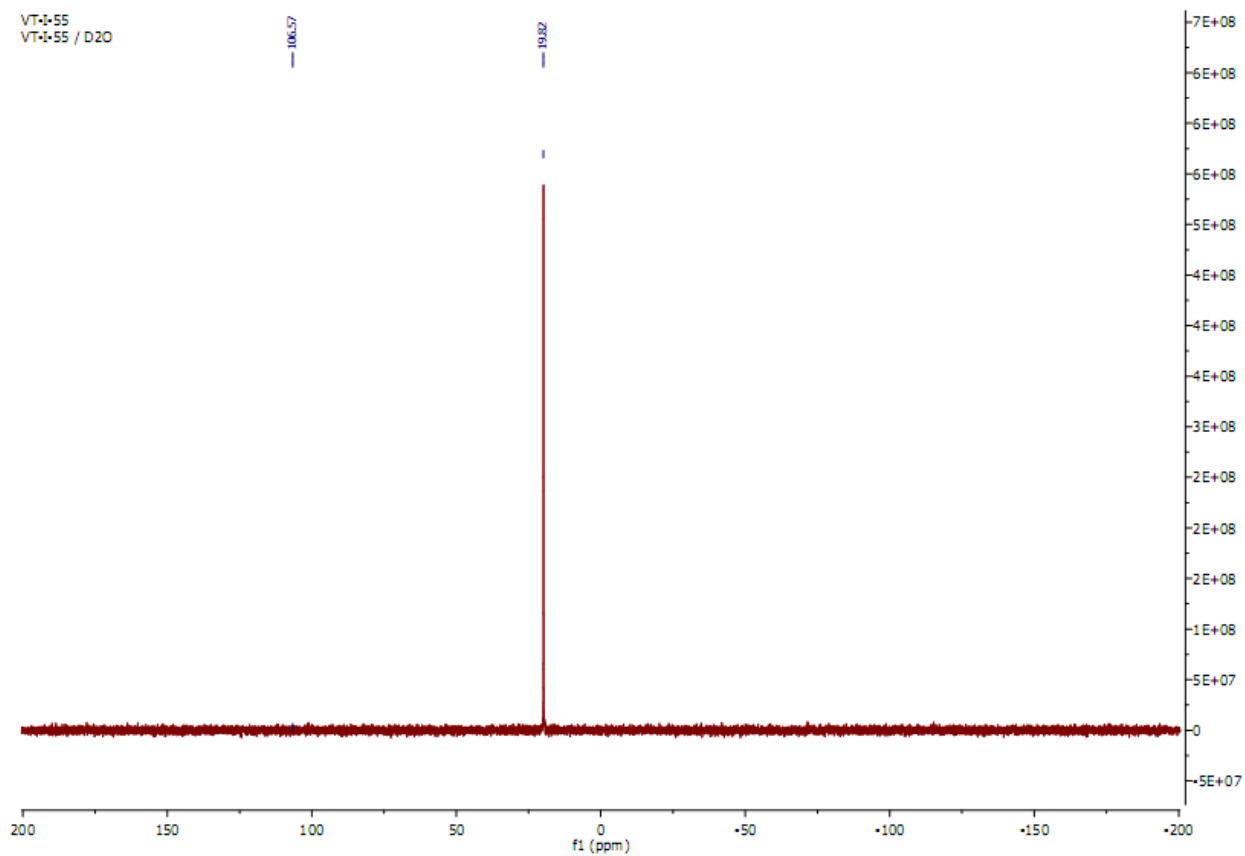

$^1\text{H}$  NMR,  $^{31}\text{P}$  NMR for compound **1f**

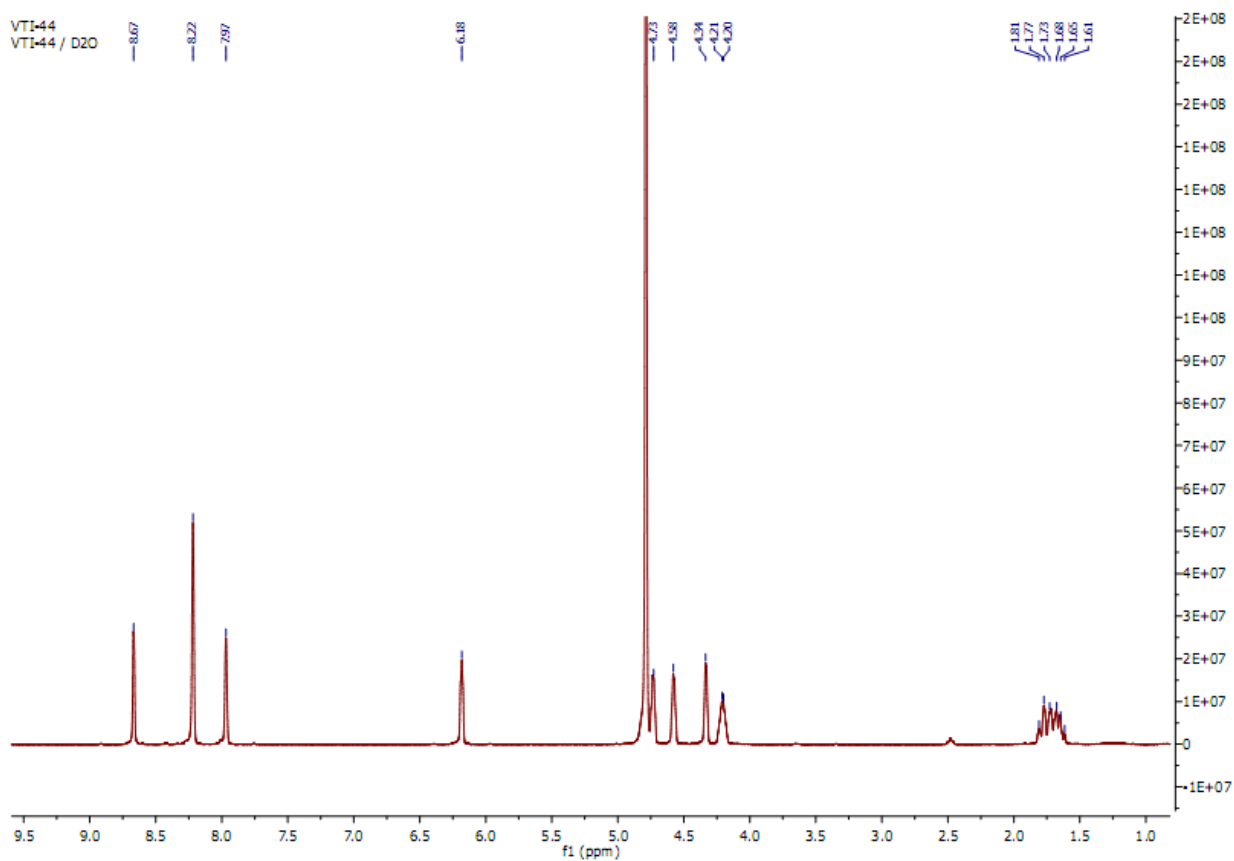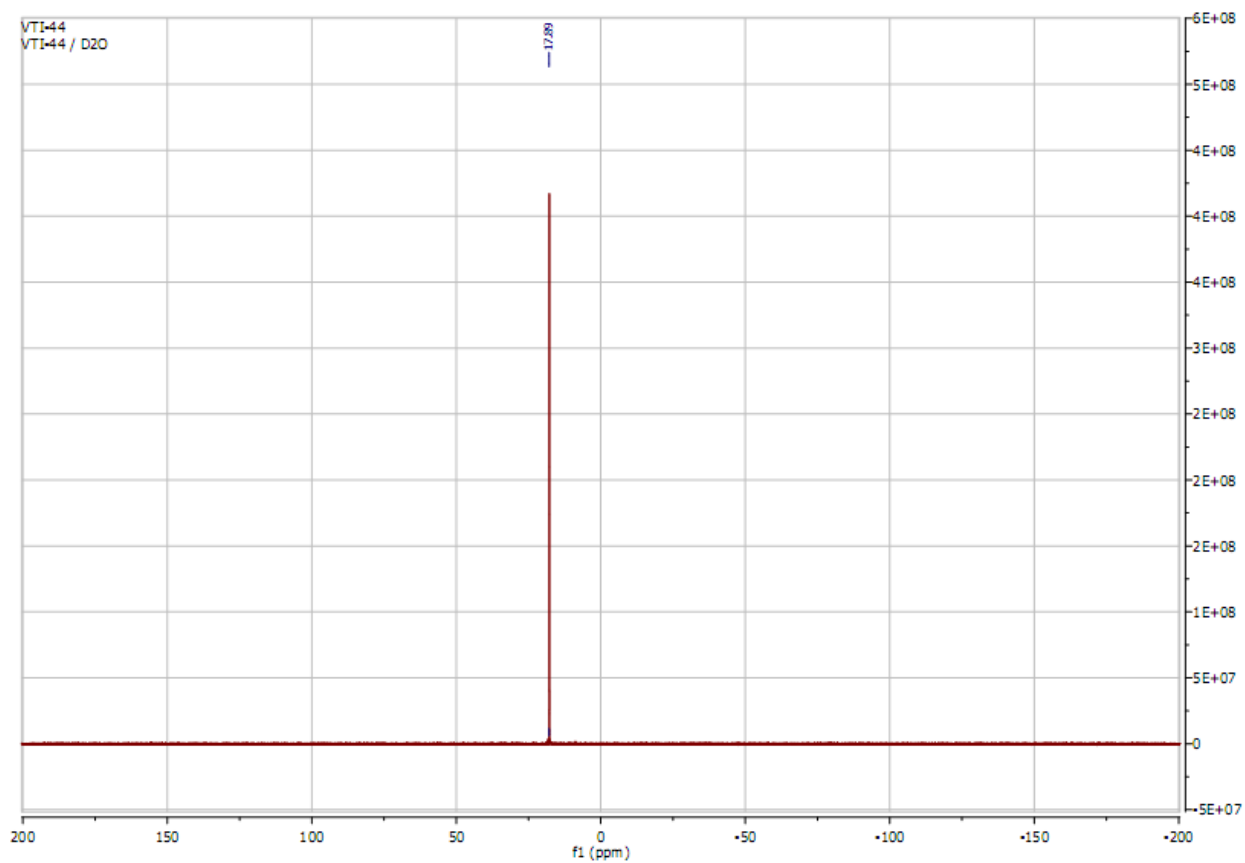



$^1\text{H}$  NMR,  $^{31}\text{P}$  NMR for compound **1g**

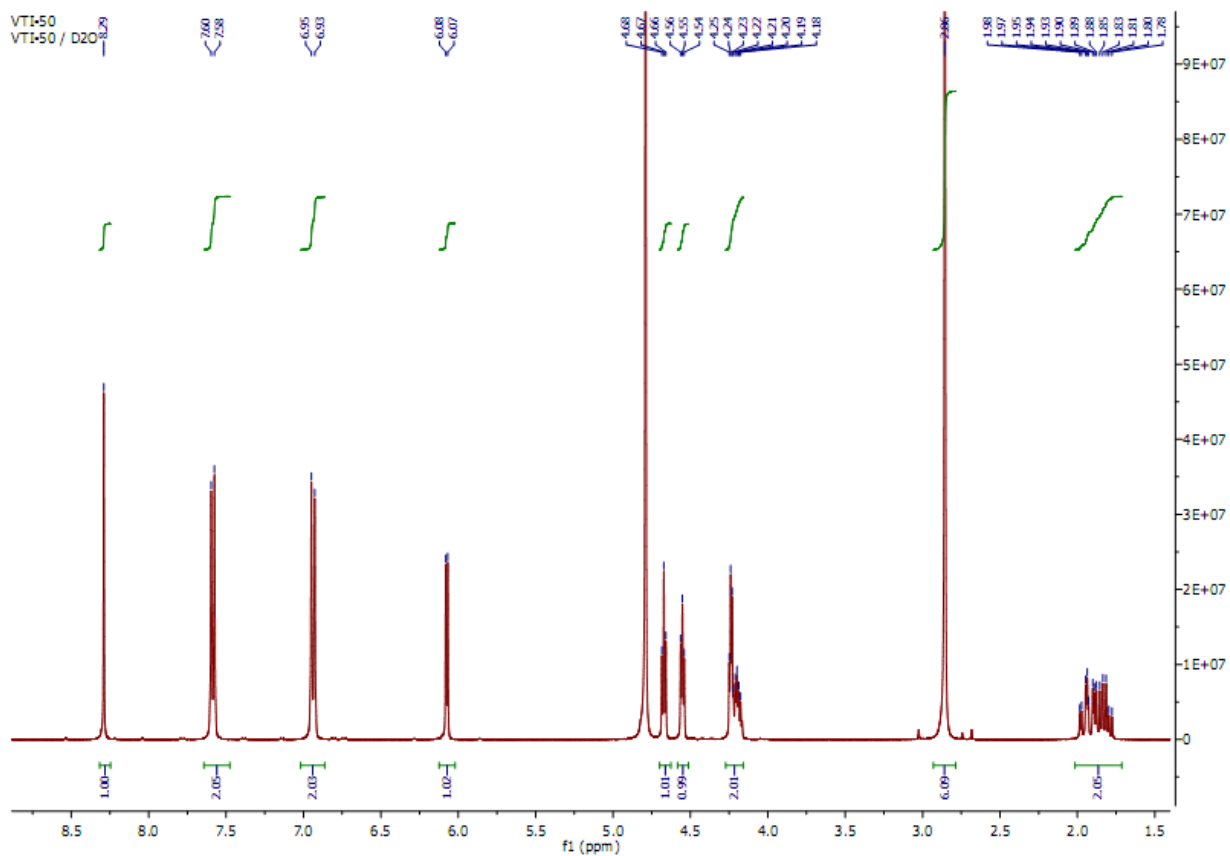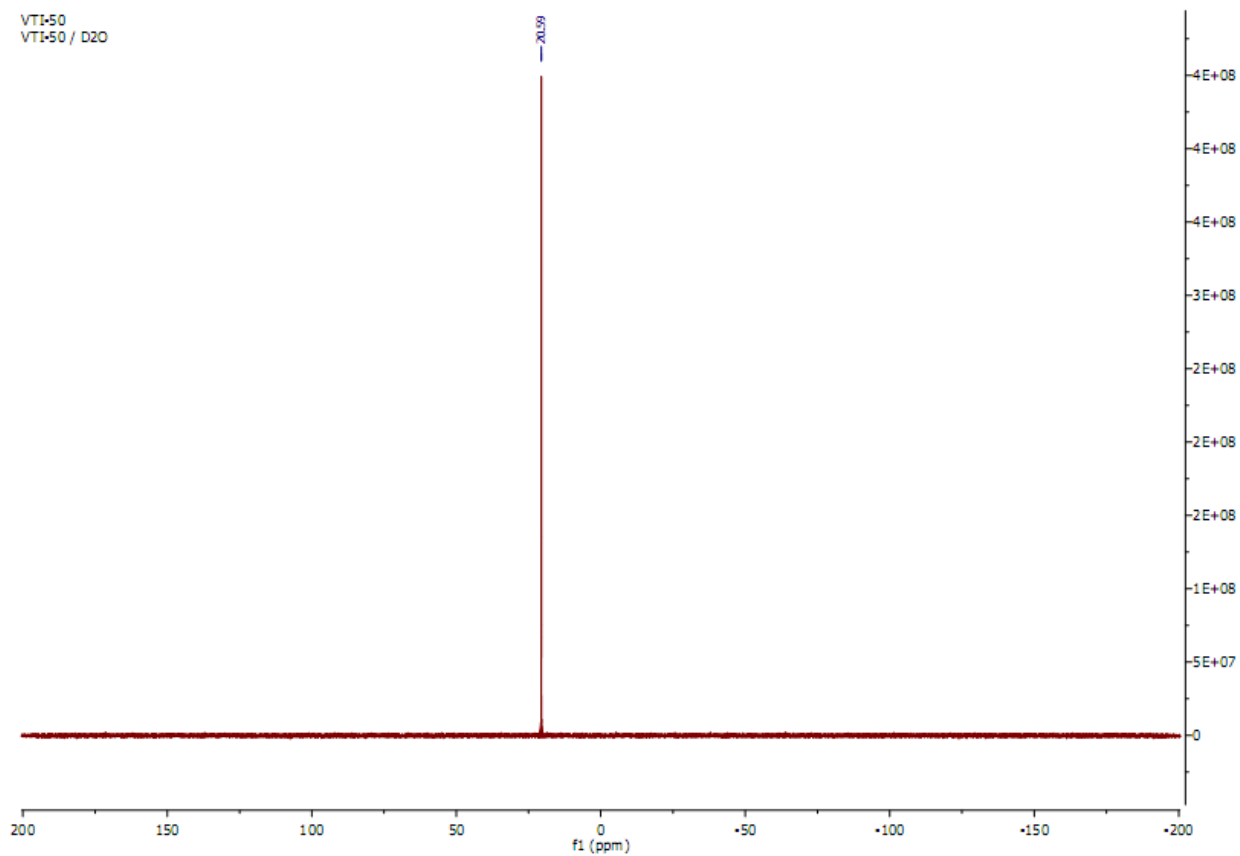

$^1\text{H}$  NMR,  $^{31}\text{P}$  NMR for compound **1h**

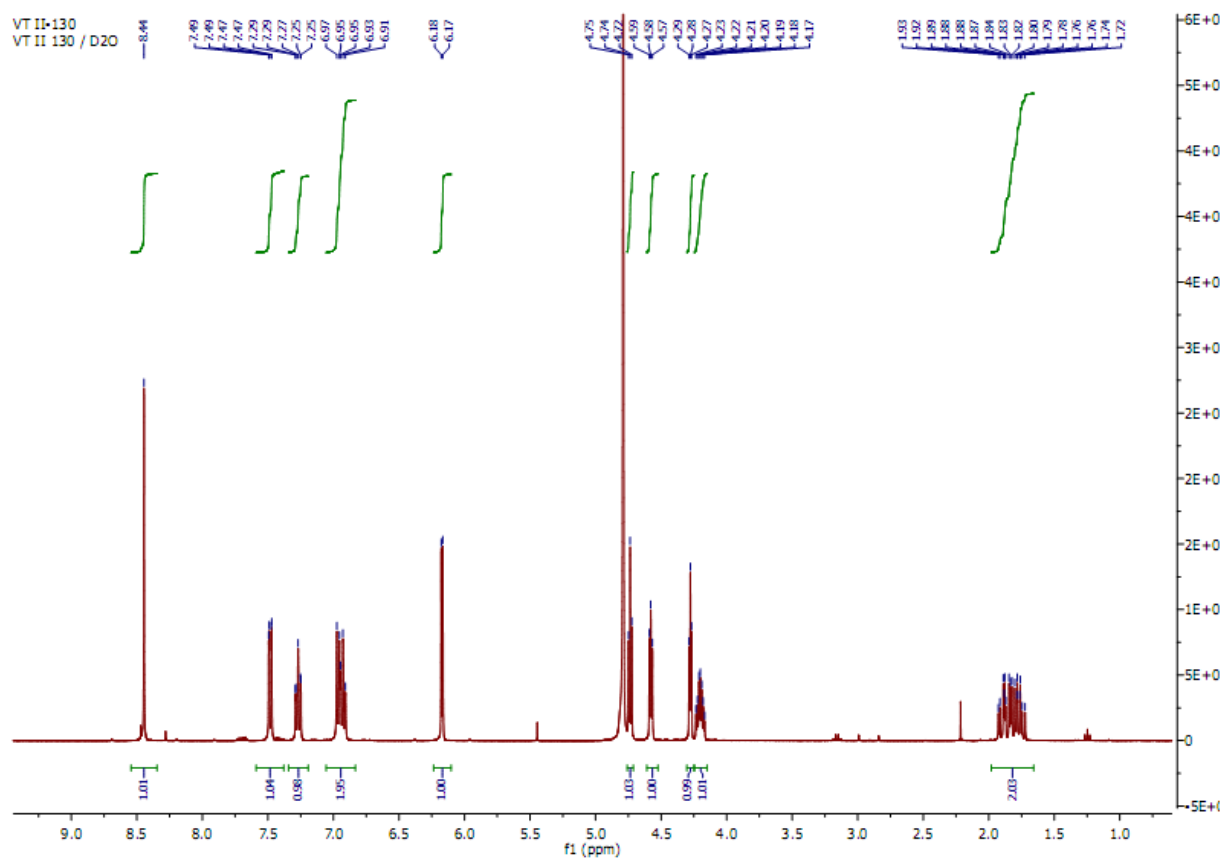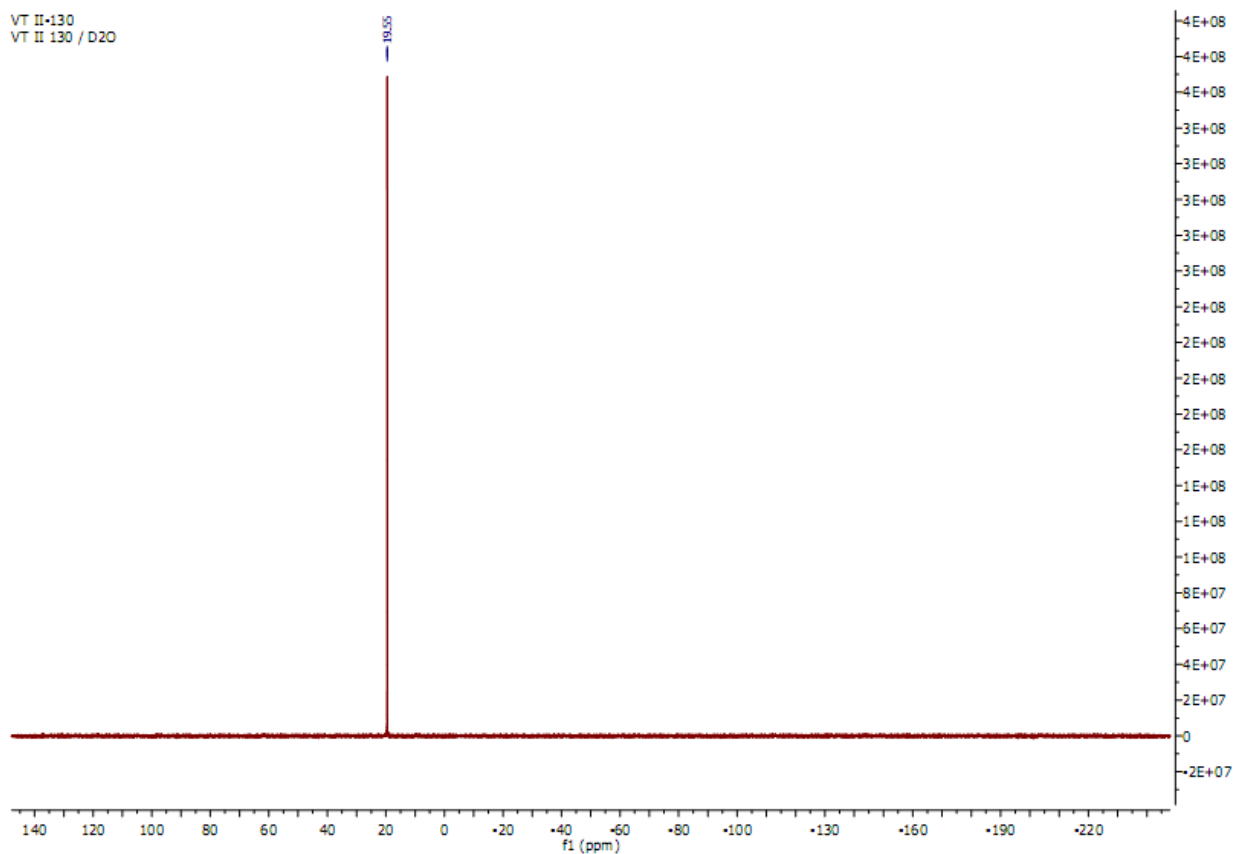

$^1\text{H}$  NMR,  $^{31}\text{P}$  NMR for compound **1i**

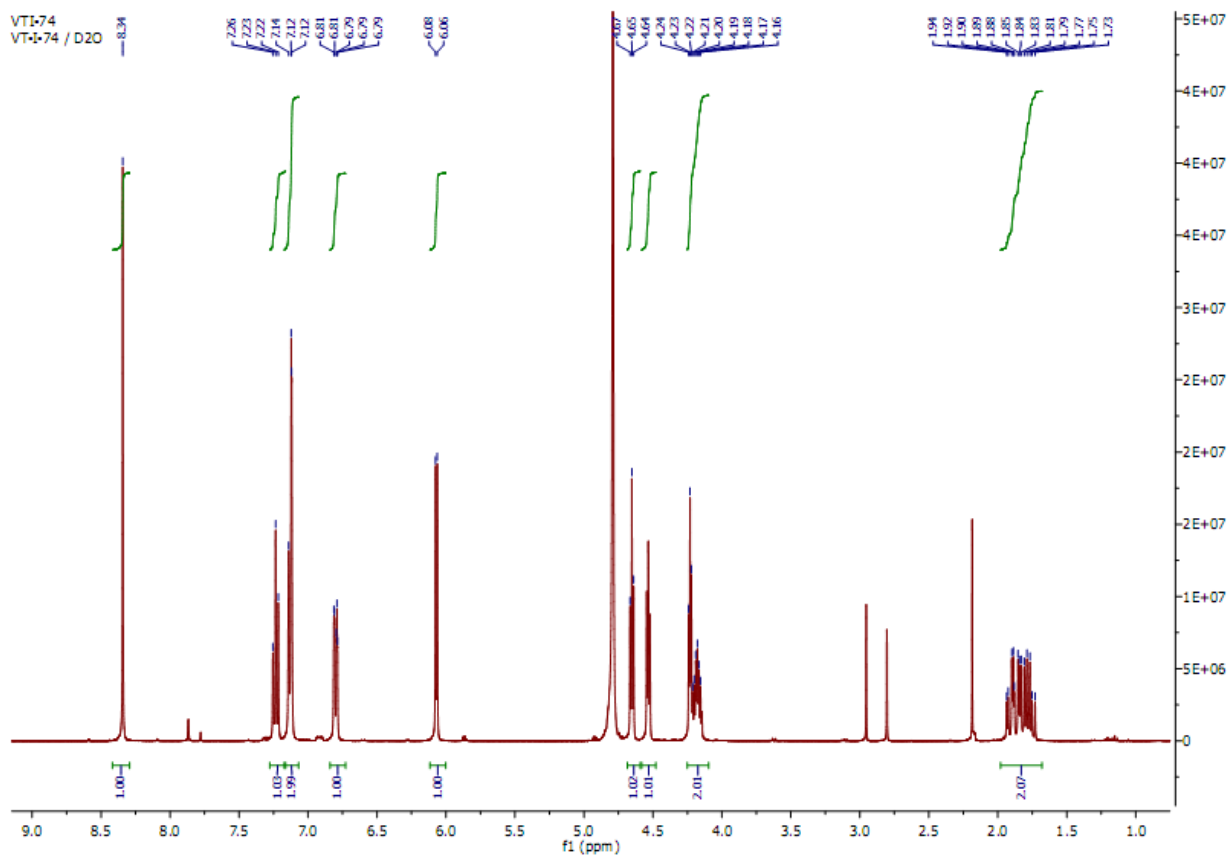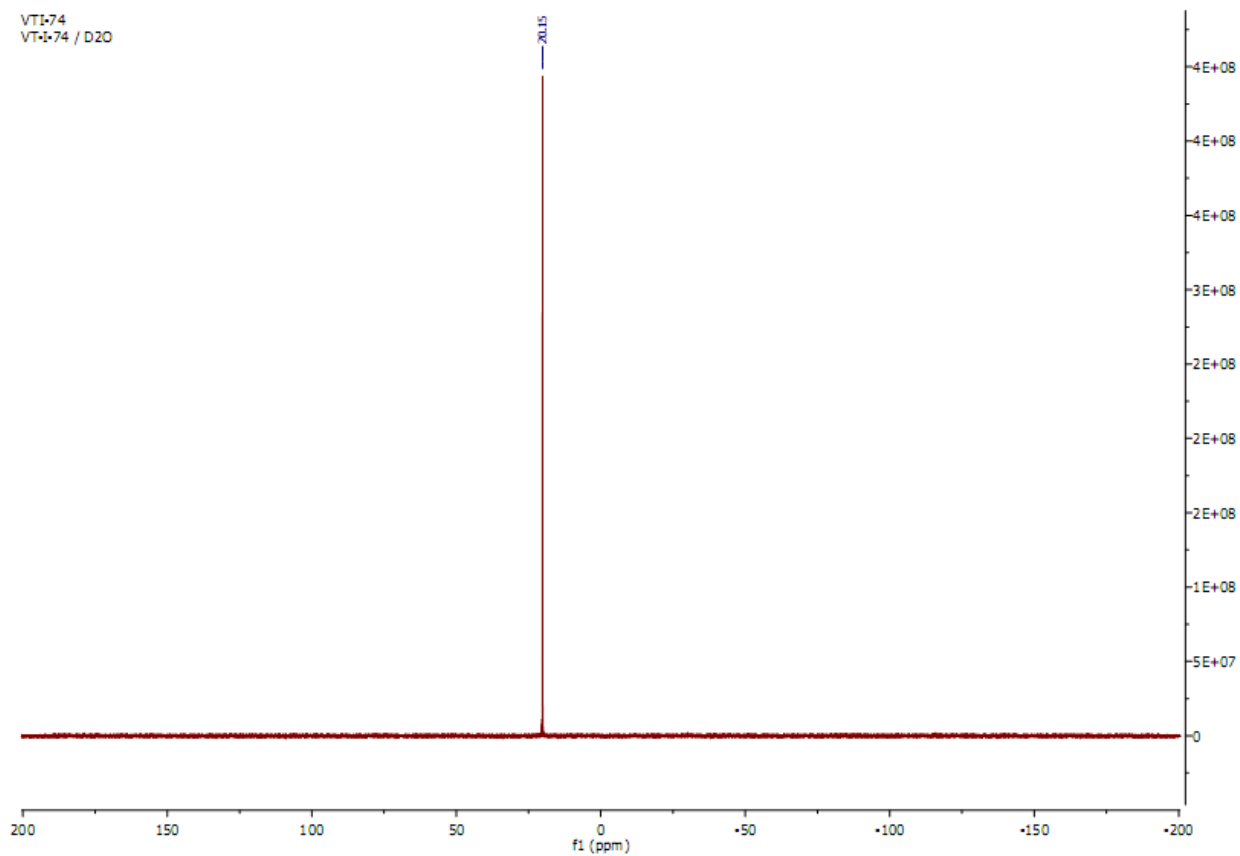

$^1\text{H}$  NMR,  $^{31}\text{P}$  NMR for compound **1j**

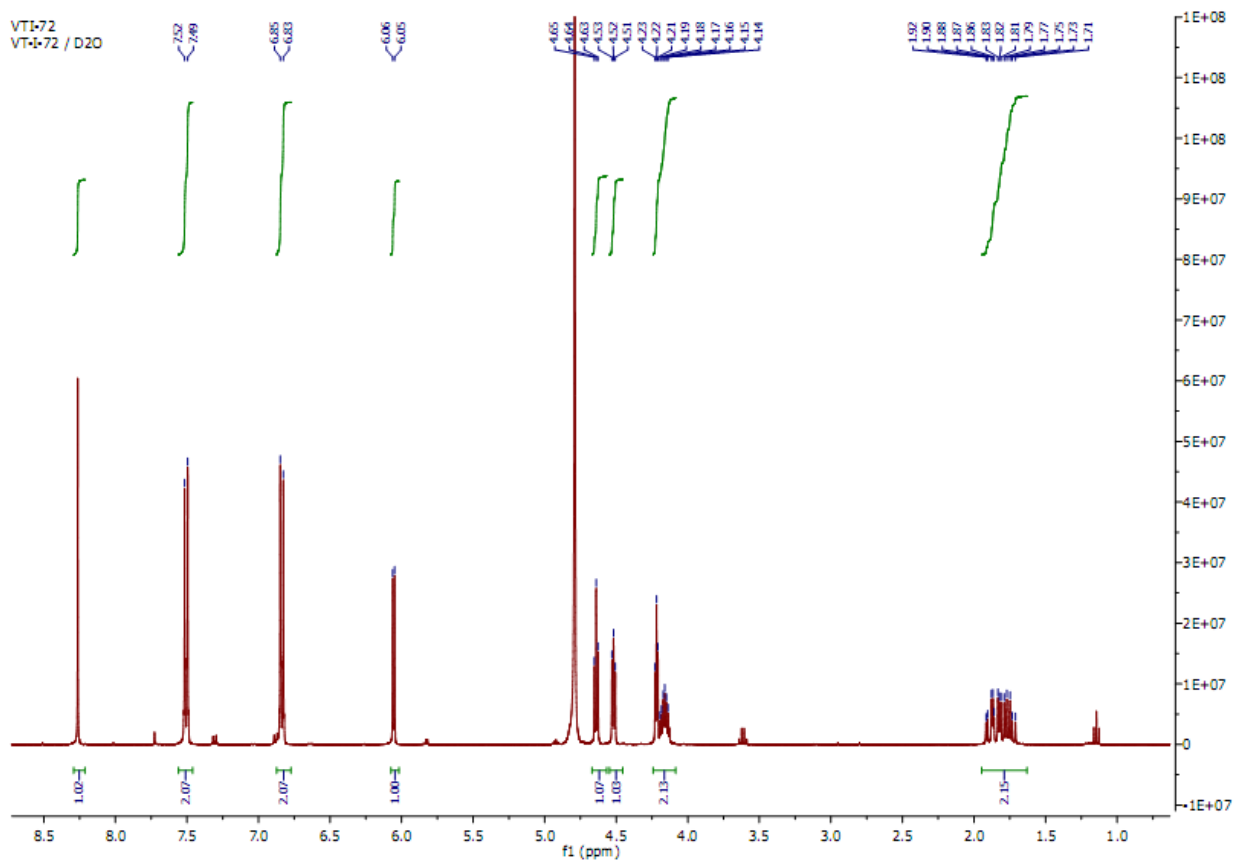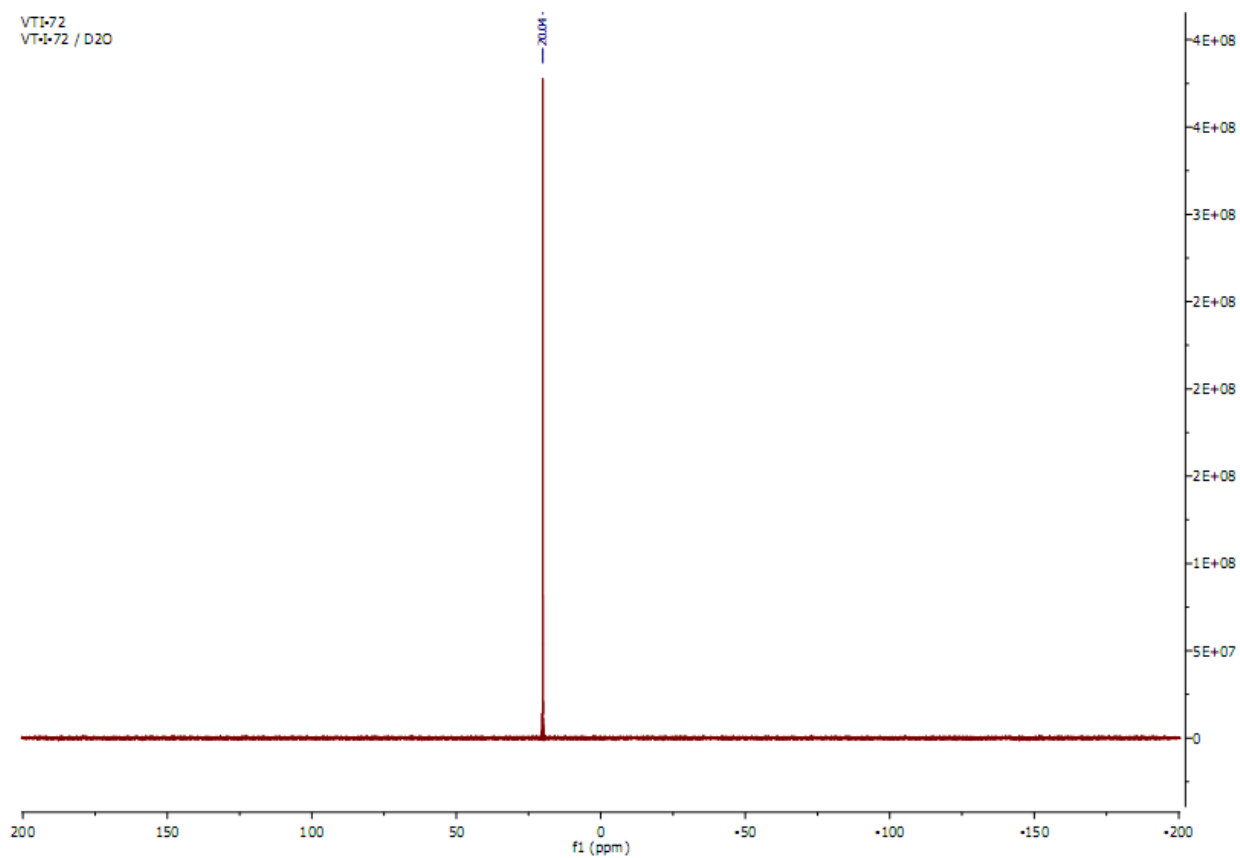

$^1\text{H}$  NMR,  $^{31}\text{P}$  NMR for compound **1k**

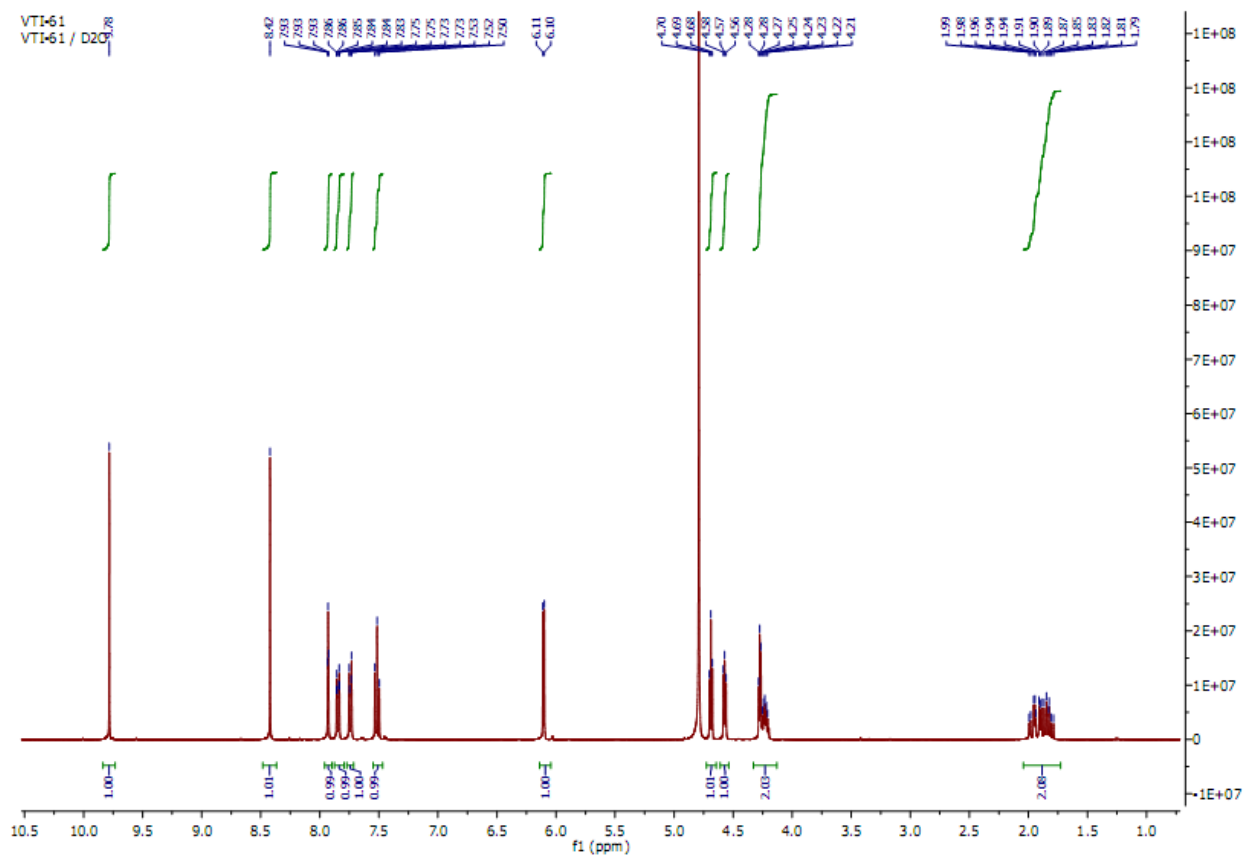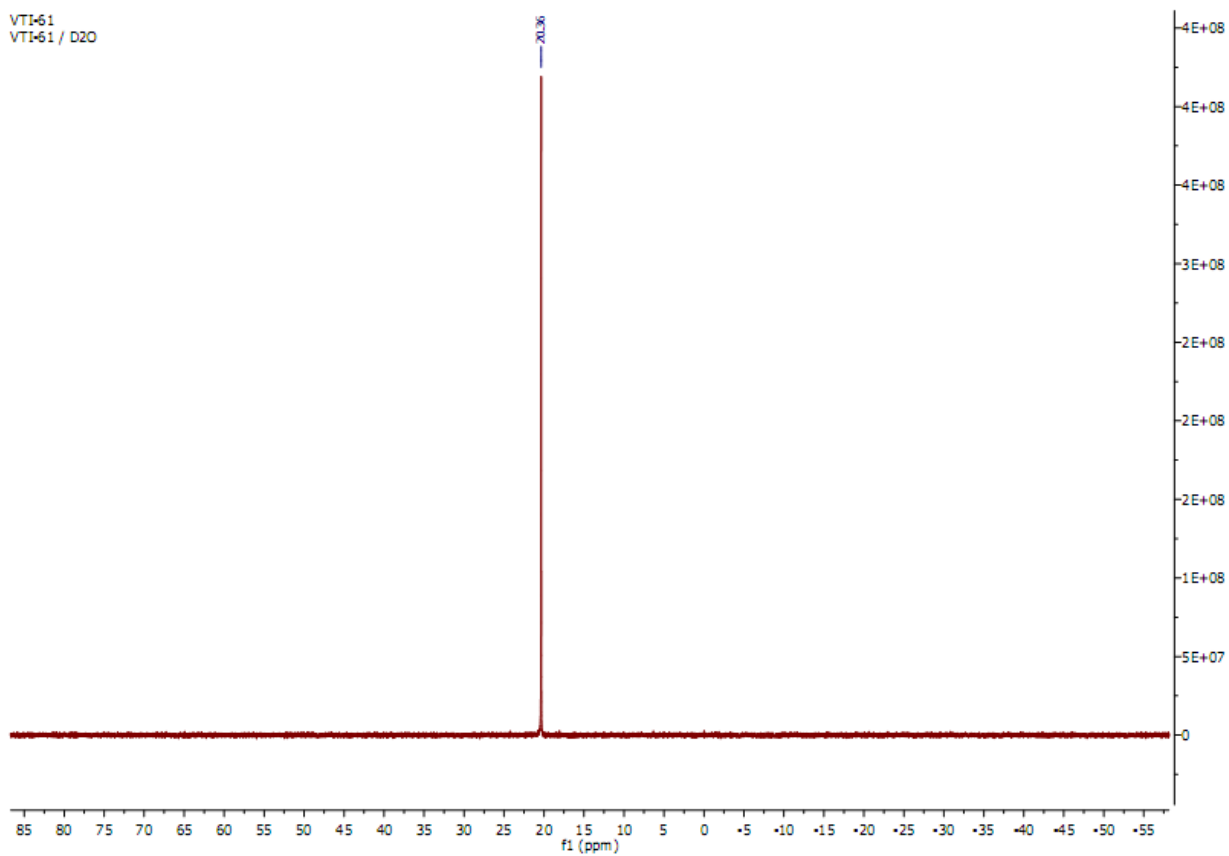

# $^1\text{H}$ NMR, $^{31}\text{P}$ NMR for compound 1I

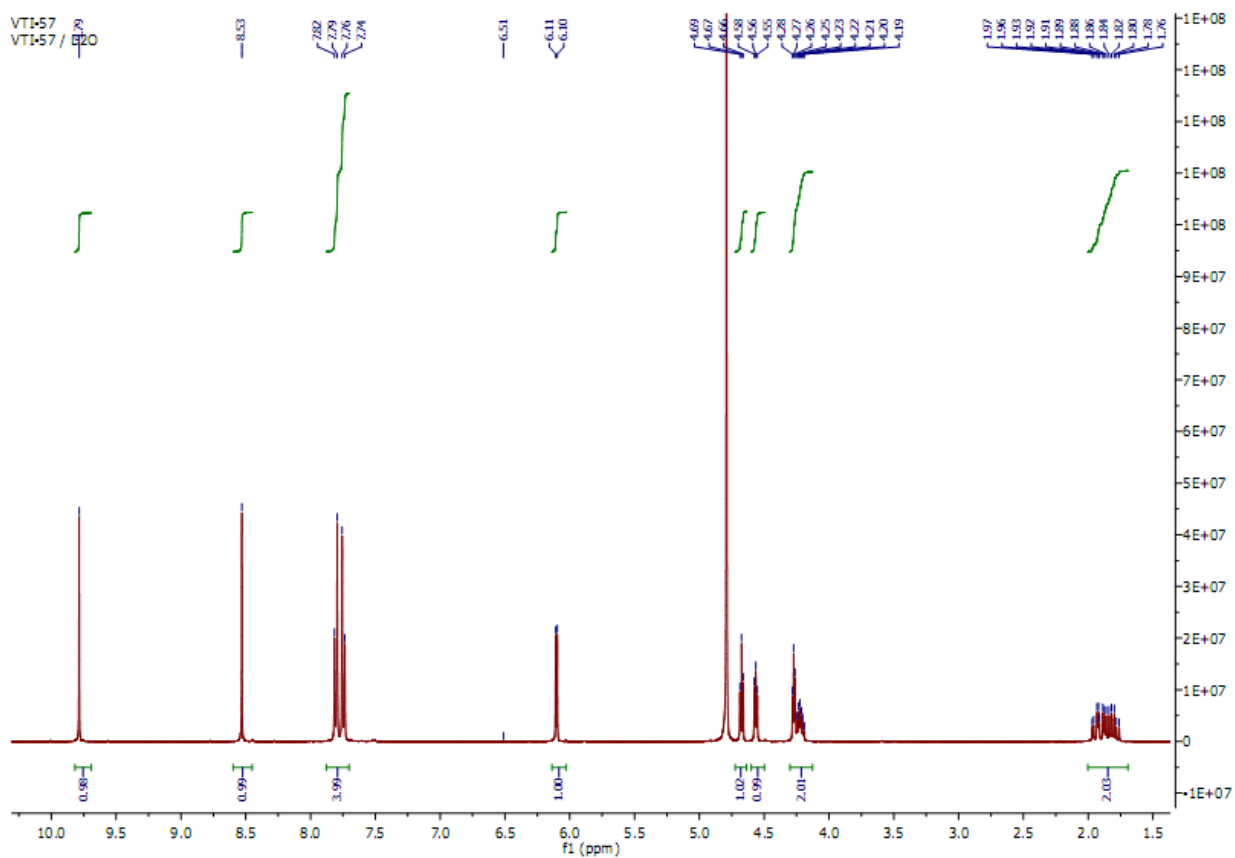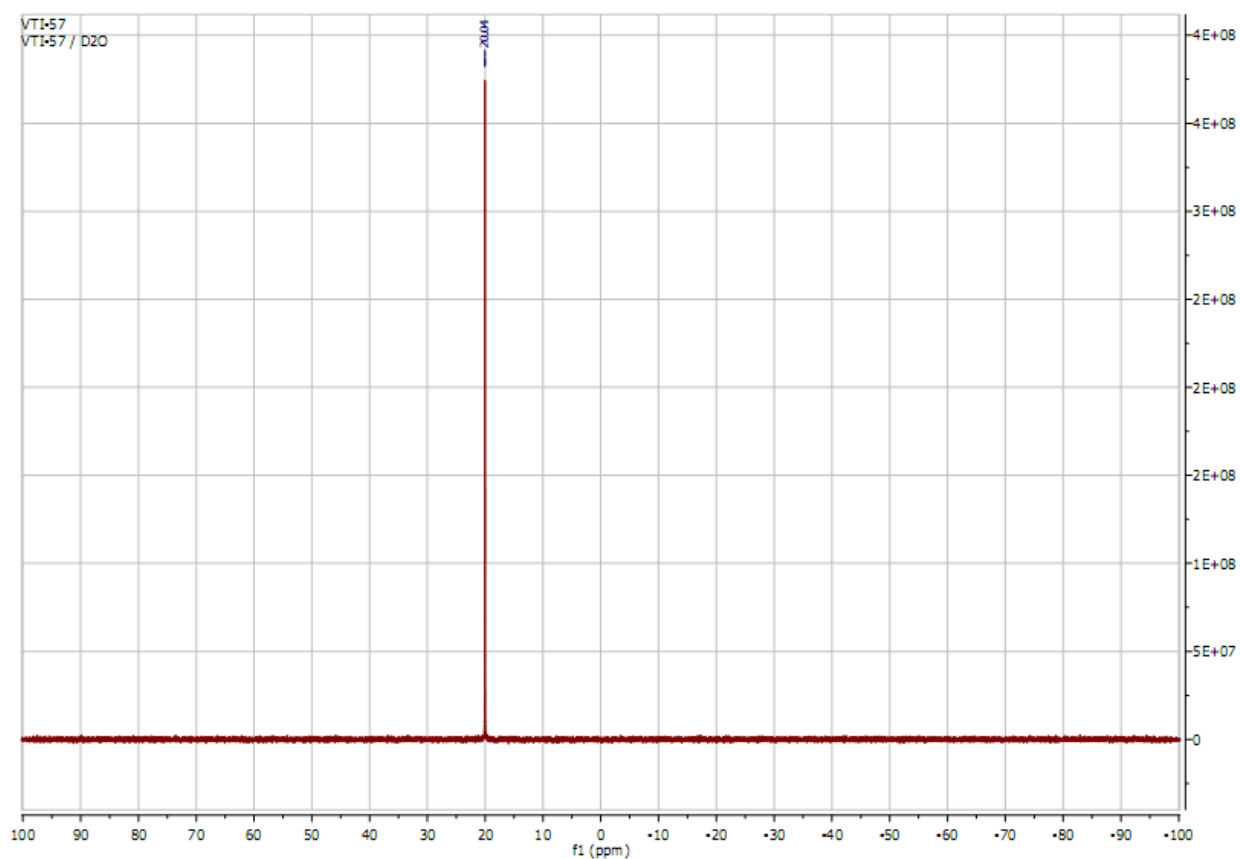

$^1\text{H}$  NMR,  $^{31}\text{P}$  NMR for compound **1m**

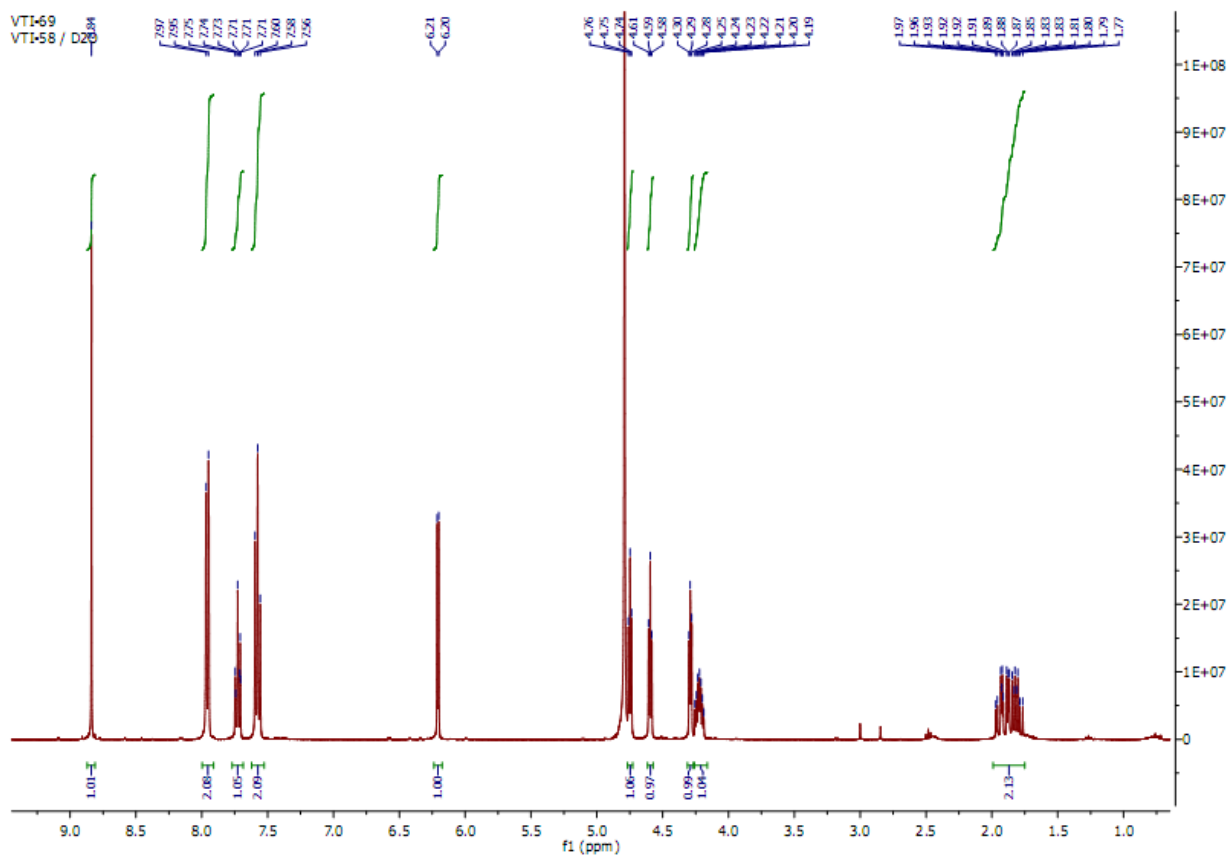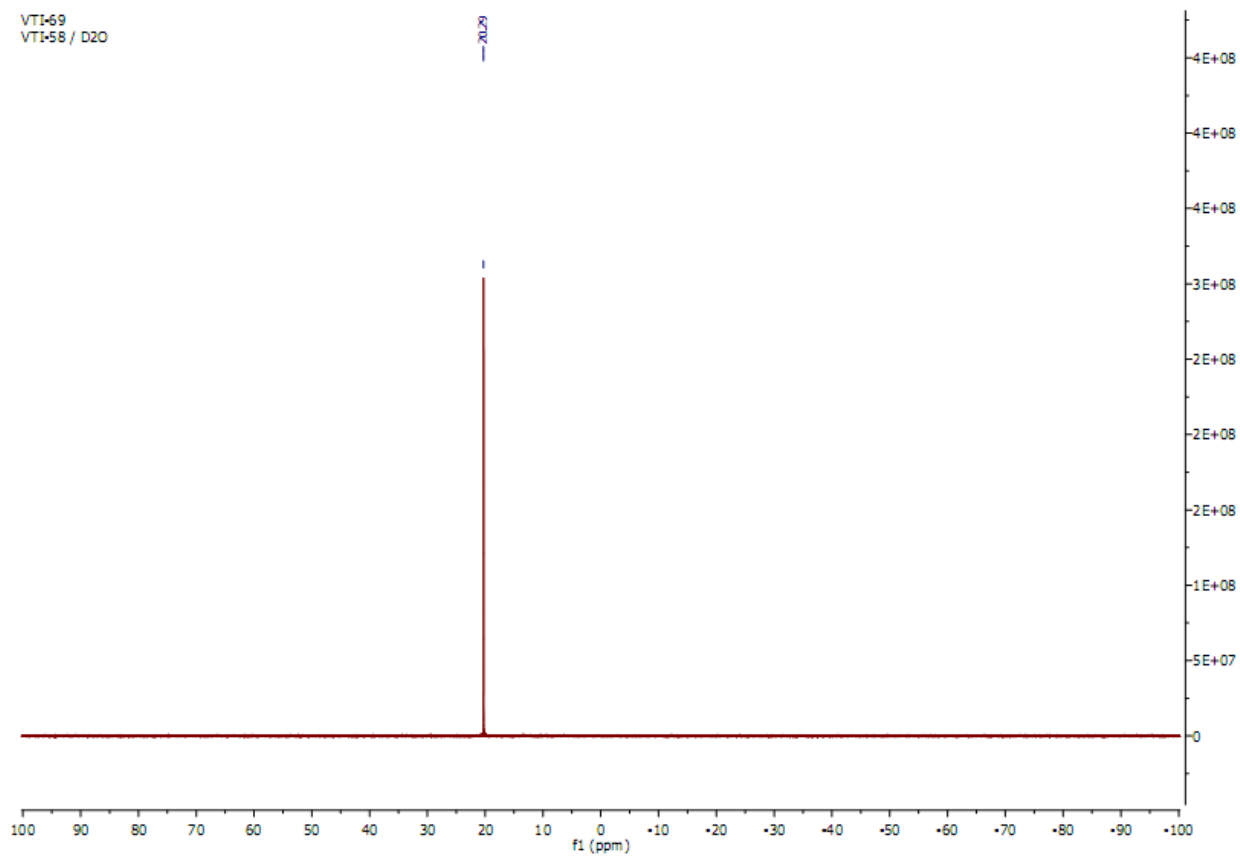

$^1\text{H}$  NMR,  $^{31}\text{P}$  NMR for compound **1n**

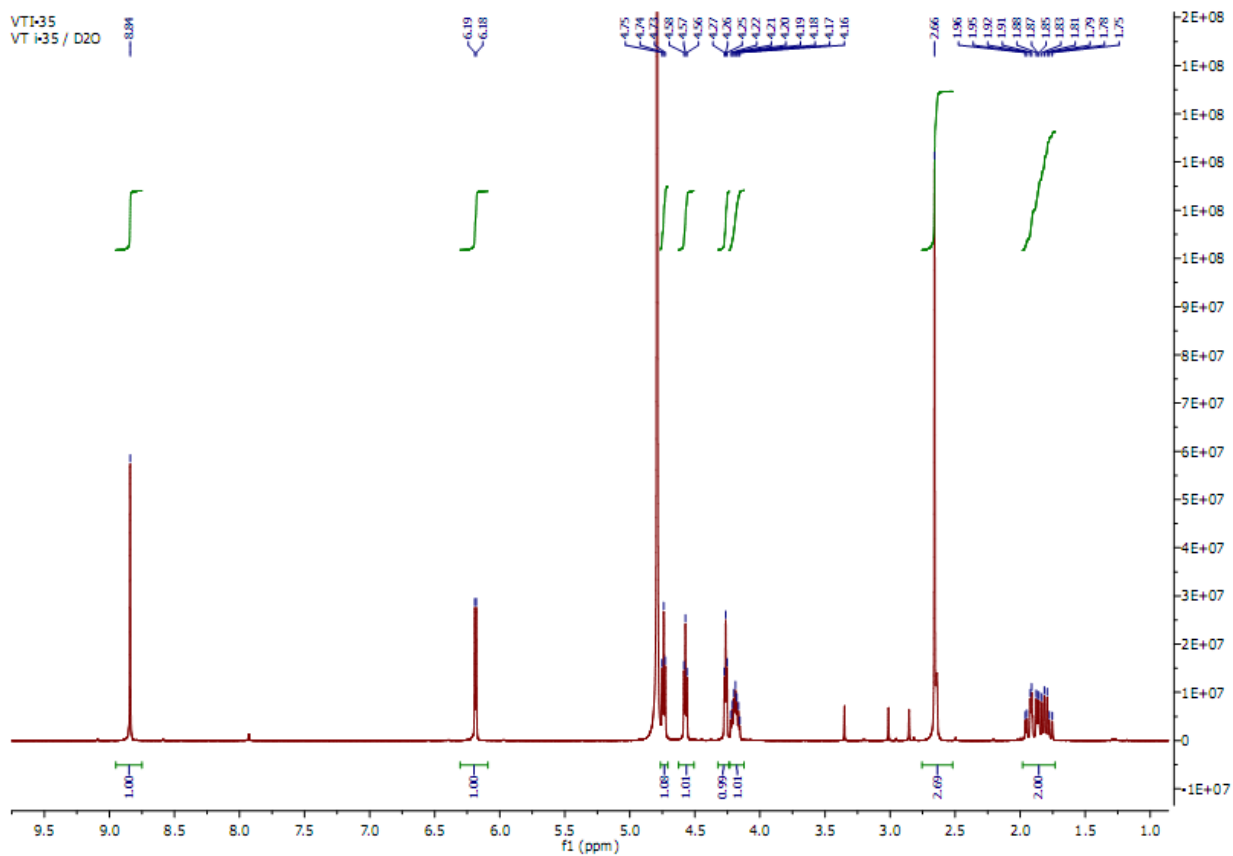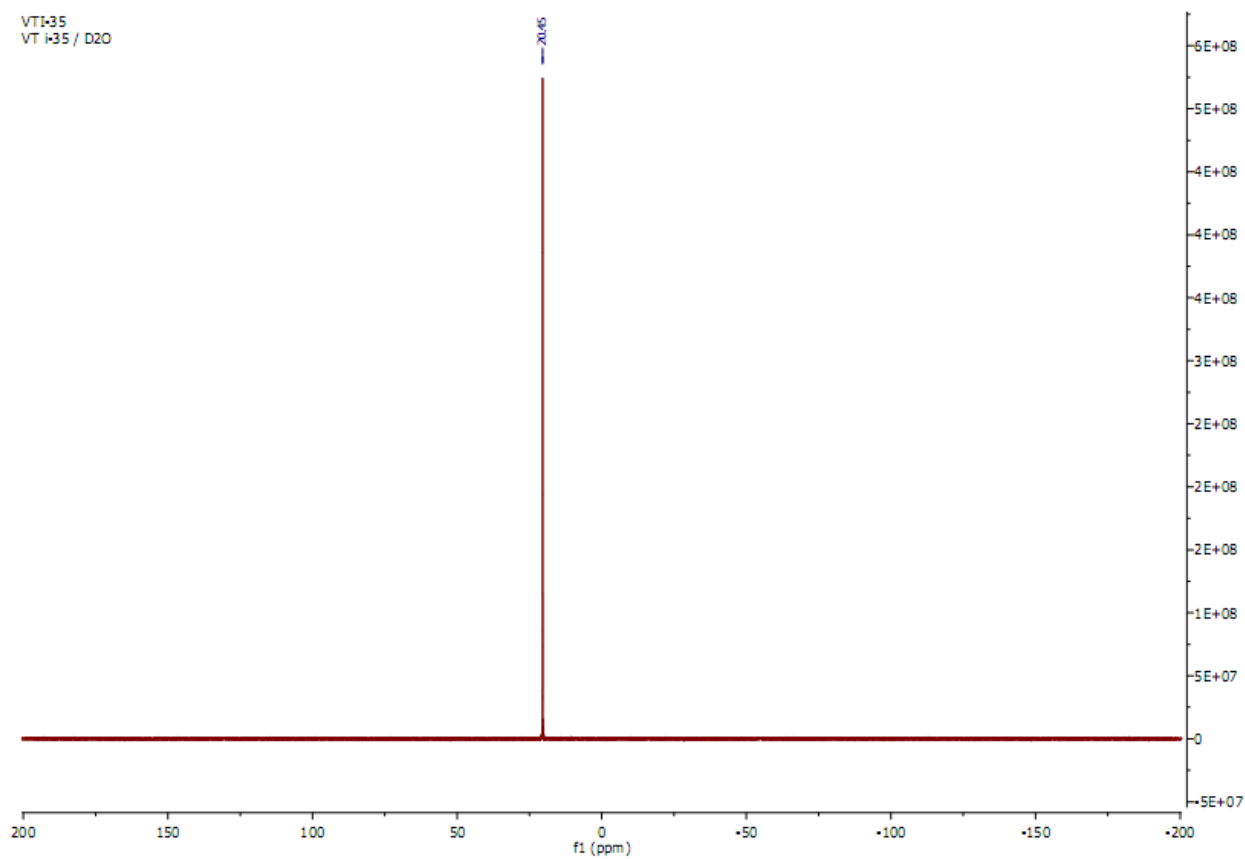



$^1\text{H}$  NMR,  $^{31}\text{P}$  NMR for compound **1o**

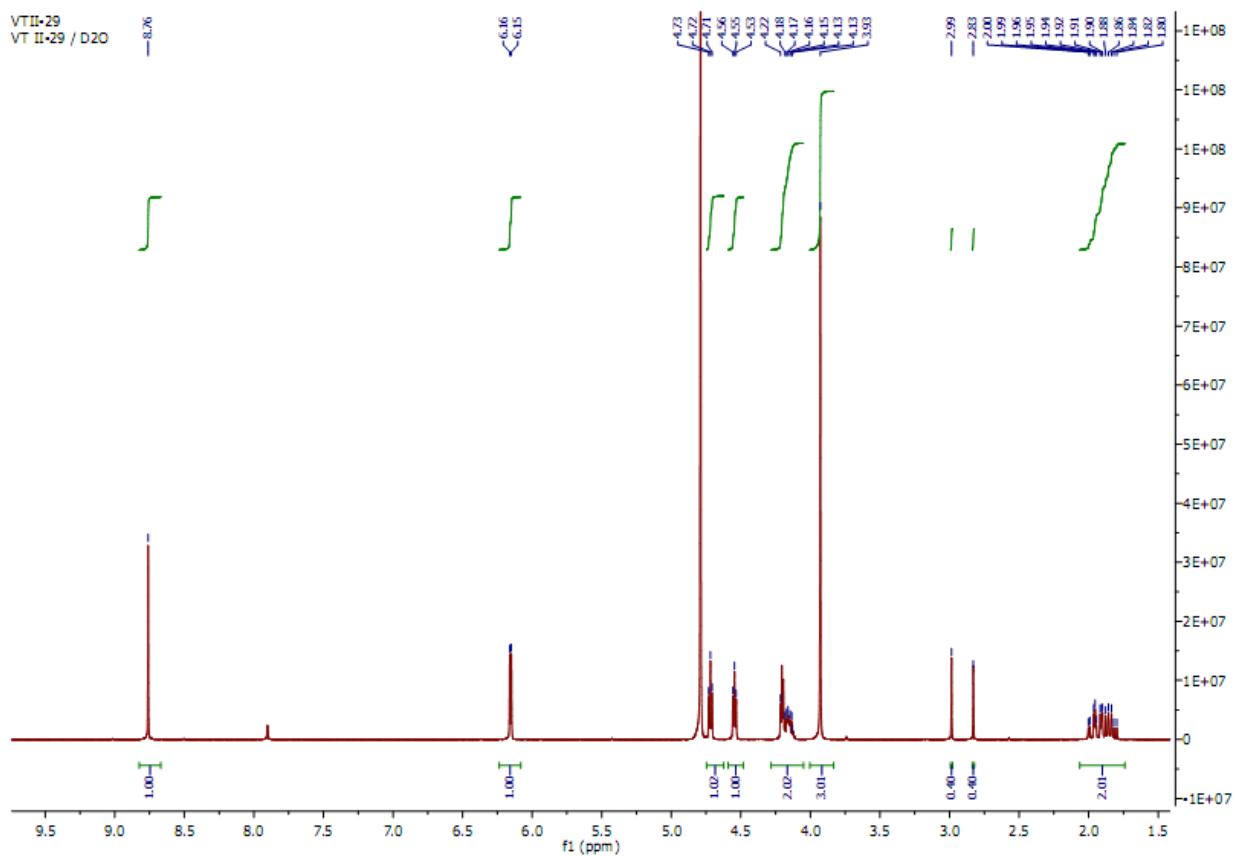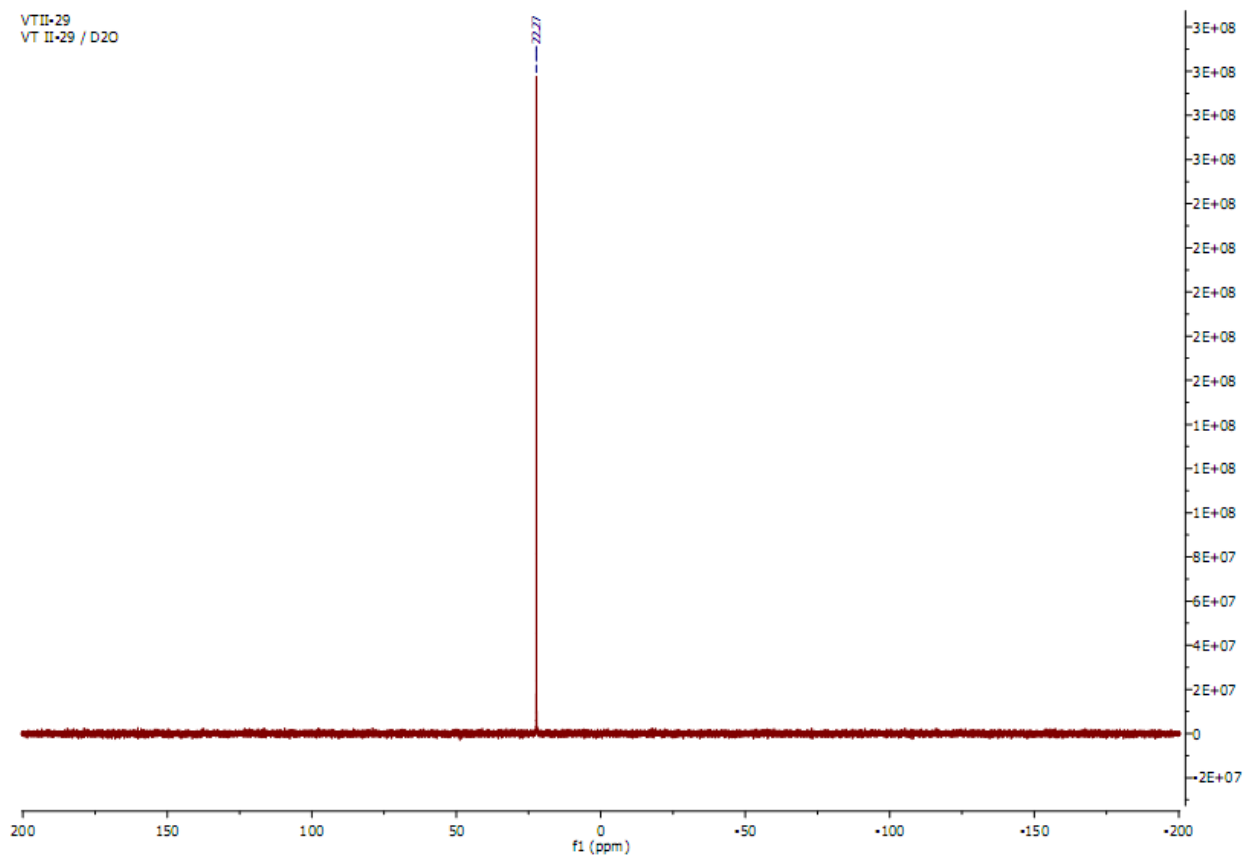

$^1\text{H}$  NMR,  $^{31}\text{P}$  NMR for compound **1p**

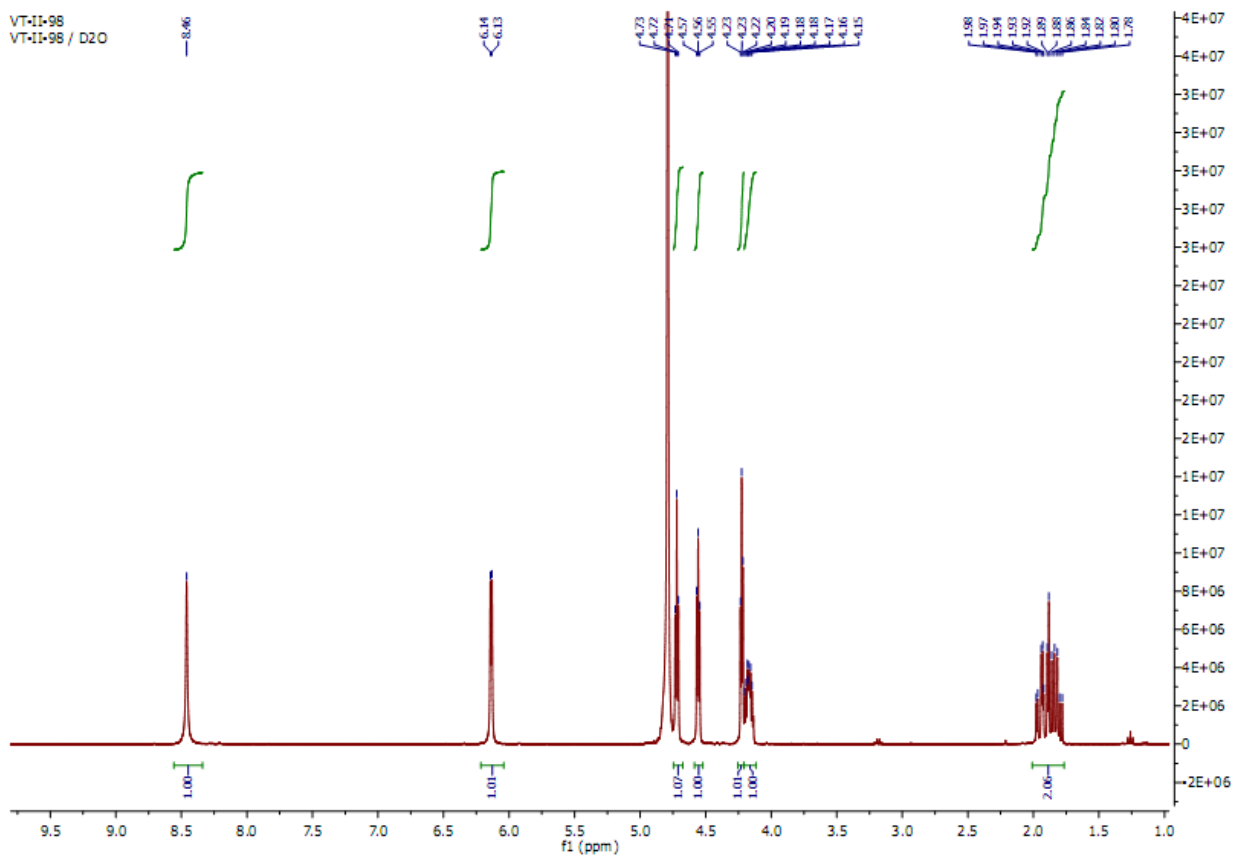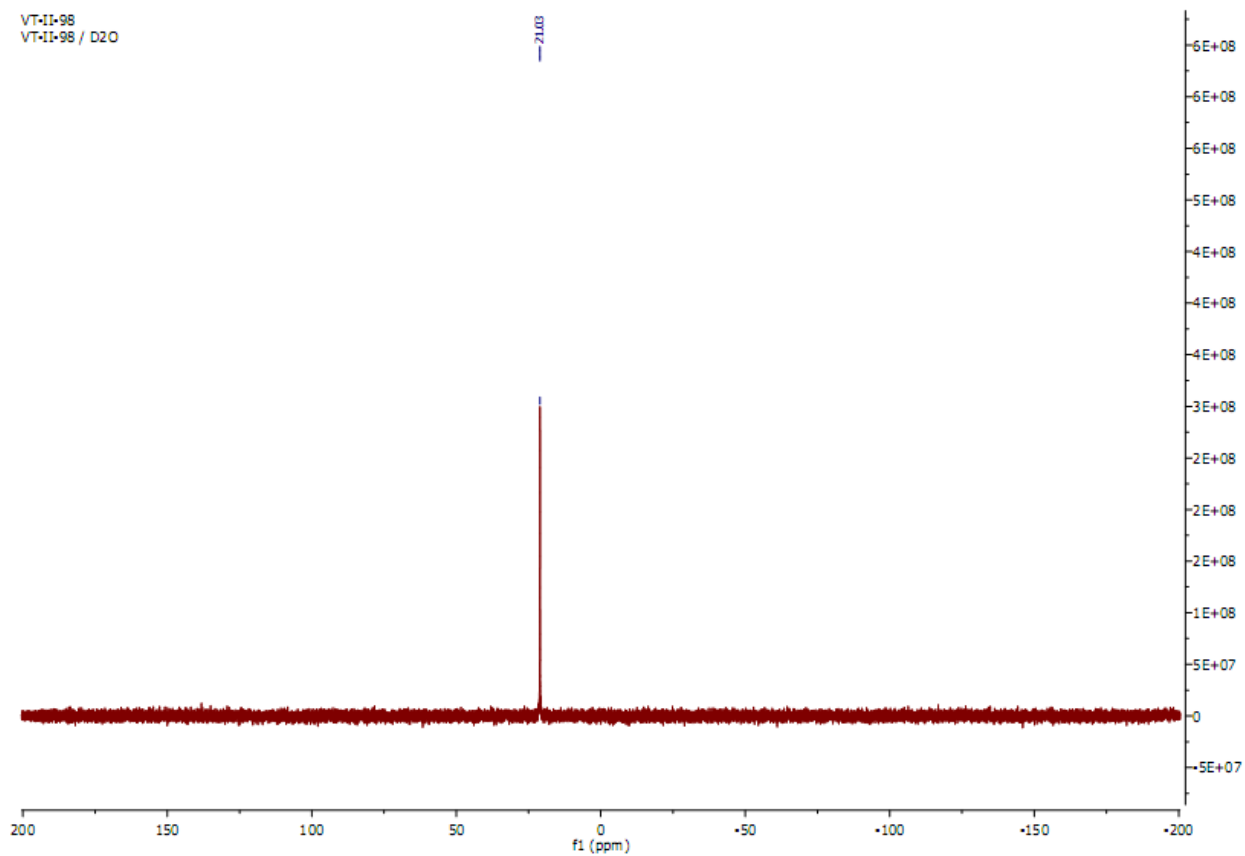

$^1\text{H}$  NMR,  $^{31}\text{P}$  NMR for compound **1q**

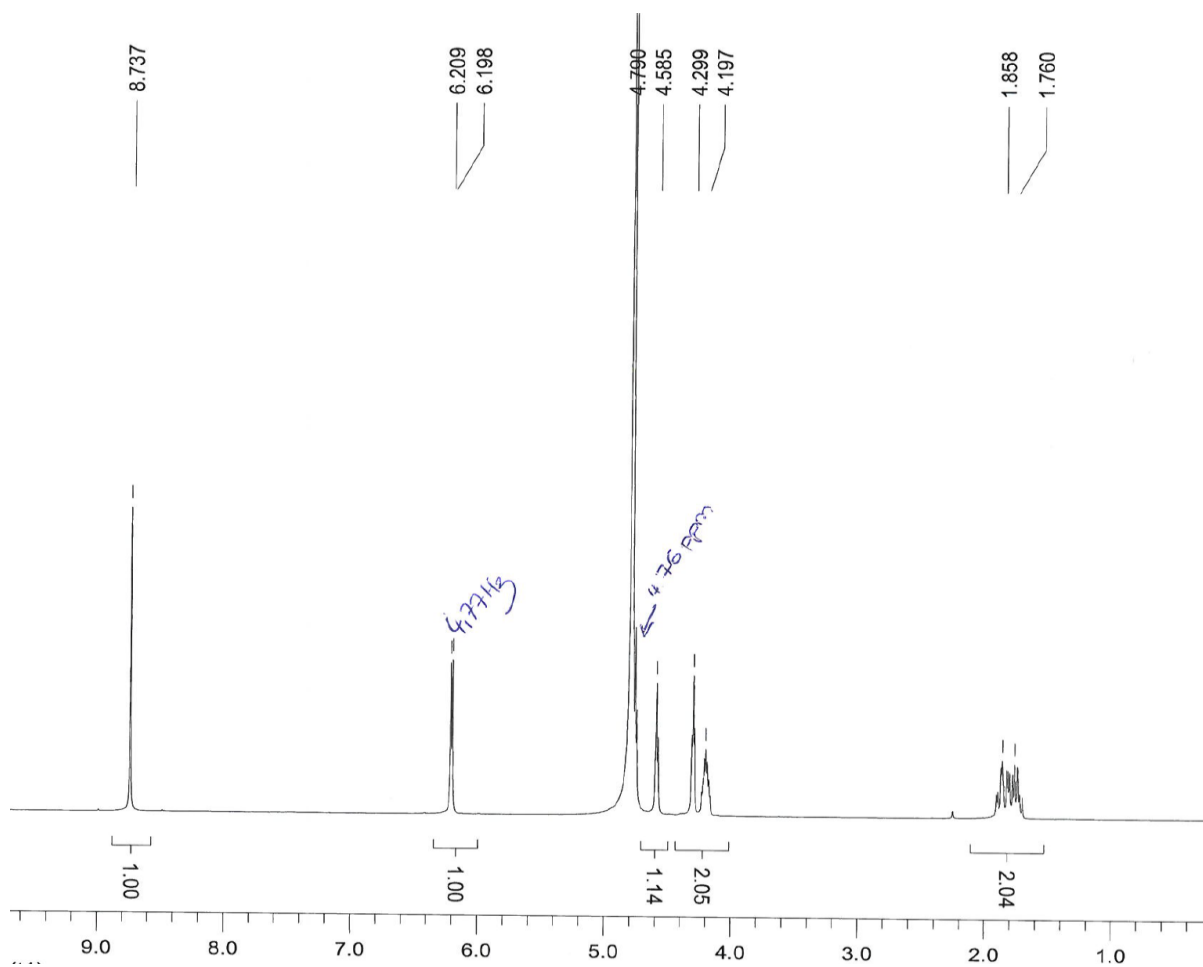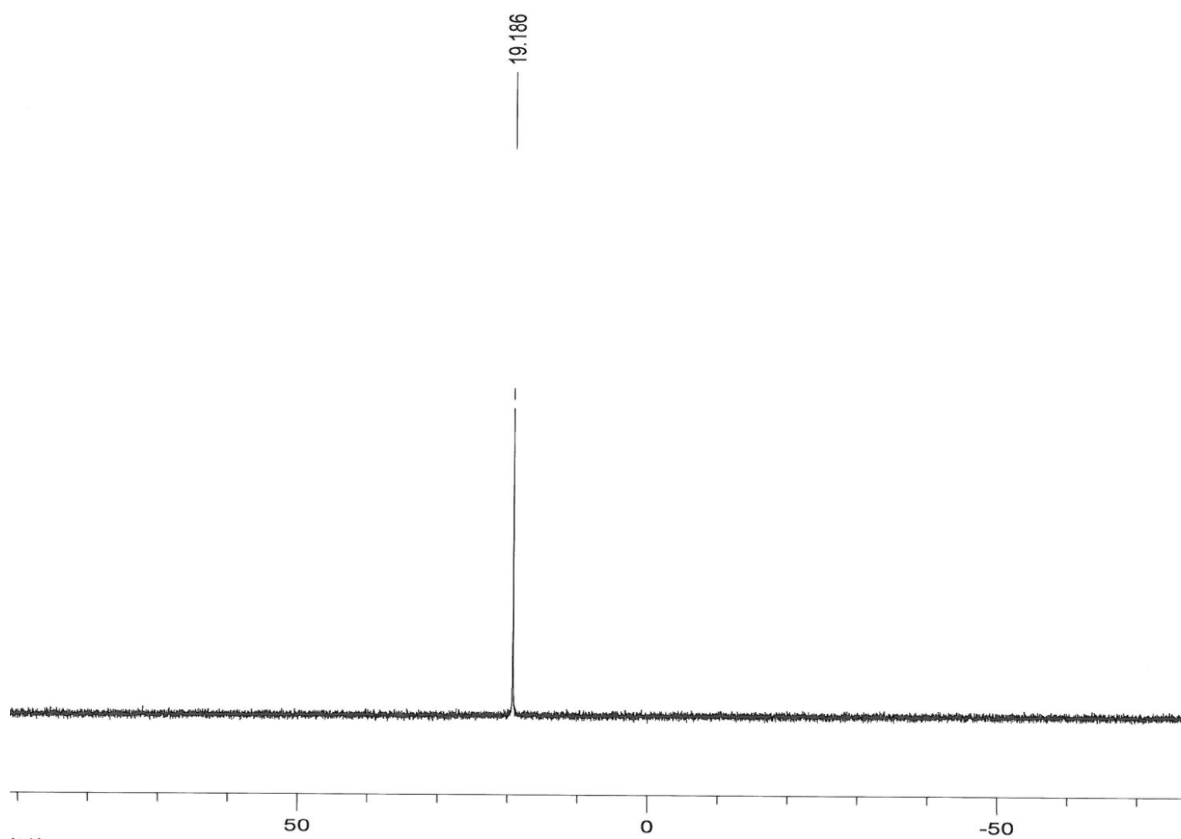

Supplement: Beilstein_J_Org_Chem-12-1476-s002.pdf [file Beilstein_J_Org_Chem-12-1476-s002.pdf]
